# Supplementary material for: BRAF Mutations: Oncogenic Drivers in Solid Tumors
Source: Preprints.org preprint supplement (doi:10.20944/preprints202401.1957.v2), 2024-02-12
Supplement: Supplementary file 1 [file supplementary]

## Sheet: Info
	All information from https://clinicaltrials.gov/
	(searched for "BRAF gene mutation", 218 results)
	Categories:			Categories further sorted by:
	1) Phase I			status (below)
	2) Phase I & II			alphabetized trial name
	3) Phase II
	4) Phase II & III			Status order:
	5) Phase III		1	Not Yet Recruiting
	6) Phase IV		2	Active (not recruiting)
	7) Phase not specified		3	Active (recruiting)
			4	Completed
			5	Available
			6	Unknown status
			7	No longer available	(deleted)
			8	Terminated	(deleted)
			9	Withdrawn	(deleted)
			10	Suspended	(deleted)
	Table . Clinical trials on BRAF mutated cancers organized by phase
	Source:
	https://clinicaltrials.gov/search?cond=BRAF%20Gene%20Mutation&page=22&rank=155&limit=10
	ClinicalTrials.gov [Internet]. Bethesda (MD): National Library of Medicine (US). 2000 Feb 29 - 2023 Dec 10.

## Sheet: Original database
Name of Trial	Status	Study Start	Study End	Phase	Class of BRAF	Mutation/fusion	Treatment	Cancer Type(s)	Number of Patients Enrolled	Highest ORR (overall response rate)	Sponsor	NCT number
French National Observatory of the Patients With Non-small Cell Lung (NSCLC) and Molecular Testings	Completed	2012-04-01	2013-04-01	N/A	Any	BRAF	N/A (observational)	Non-Small Cell Lung Cancer	17664	N/A	Intergroupe Francophone de Cancerologie Throacique	NCT01700582
Real-Time Monitoring of Symptoms in Lung Cancer Patients Receiving Oral Targeted Therapies	Active, recruiting	2022-08-25	N/A	N/A	Any	BRAF	Device-based interventions	Non-Small Cell Lung Cancer	75	N/A	University of Virginia	NCT05370469
BRAF V600-mutated Lung Carcinoma Treated With the Combination of Dabrafenib-trametinib: a Retrospective Evaluation	Completed	2021-03-08	2021-12-31	N/A	Class I	BRAF V600	N/A (observational)	Non-Small Cell Lung Cancer	163	N/A	Intergroupe Francophone de Cancerologie Thoracique, Novartis Pharmaceutials	NCT04775095
A Study in Patients With BRAF V600E-mutant Metastatic Non-small Cell Lung Cancer (OCTOPUS)	Active, recruiting	2022-06-23	N/A	N/A	Class I	BRAF V600E	N/A (observational)	Metastatic NSCLC	200	N/A	Pierre Fabre Medicament	NCT05546905
Advanced Melanoma in Russian Experience	Completed	2018-10-08	2019-04-27	N/A	Class I	BRAF V600	N/A (observational)	Melanoma	382	0.574	MelanomaPRO, Russia	NCT03663647
A Clinical-biological Prospective Cohort of Patients With BRAFV600E-mutated Metastatic Colorectal Cancer	Active, recruiting	2023-07-24	N/A	N/A	Class I	BRAF V600E	N/A (Sample collecting)	Metastatic Colorectal Cancer	400	N/A	UNICANCER	NCT05639413
Study to Analyze Mutations in V600 BRAF Oncogen in Participants With Metastatic Melanoma	Completed	2013-06-01	2014-10-01	N/A	Class I	BRAF V600	N/A (observational)	Metastatic Melanoma	264	N/A	Hoffmann-La Roche	NCT02663232
Mutation Analysis and Copy Number Changes of KRAS and BRAF Gene in Taiwanese Cases of Biliary Tact Adenocarcinoma	Unknown status	2011-01-01	N/A	N/A	Any	BRAF	N/A (observational)	Biliary Tract Adenocarcinoma	100	N/A	Far Eastern Memorial Hospital	NCT01588860
Early Rebiopsy to Identify Biomarkers of Tumor Cell Survival Following EGFR, ALK, ROS1 or BRAF TKI Therapy	Active, recruiting	2016-04-20	N/A	N/A	Class I	BRAF V600E	N/A (observational)	Lung Adenocarcinoma	20	N/A	University of Colorado, Denver	NCT03042221
OPTImal PALliative Anti-epidermal Growth Factor Receptor Treatment in Metastatic Colorectal Cancer -	Completed	2018-06-01	2022-12-31	N/A	Any	BRAF	N/A (observational)	Metastatic Colorectal Cancer	49	N/A	Karen-Lise Garm Spindler	NCT03750175
A Retrospective Non Interventional Study on First Line Treatment for Patients With BRAFV600E Mutant Metastatic Colorectal Cancer (mCRC)	Completed	2020-04-12	2021-05-12	N/A	Class I	BRAF V600E	N/A (observational)	Metastatic Colorectal Cancer	274	N/A	Pierre Fabre Medicament	NCT04317599
Evaluate the Efficacy and Safety of Aspirin in Combination With Trametinib and Dabrafenib	Not Yet Recruiting	N/A	N/A	N/A	Class I	BRAF V600E	Dabrafenib + Trametinib + Aspirin	Non-Small Cell Lung Cancer	36	N/A	Daping Hospital and the Research Institute of Surgery of the Third Military Medical University	NCT05988697
Study to Test Genetic Alterations Among Different Dermoscopic Types of Melanocytic Nevi.	Completed	2006-09-01	2010-04-01	N/A	Any	BRAF	N/A (Sample collecting)	Melanocytic Nevi	43	N/A	Medical University of Graz	NCT00422448
Detection of KRAS, NRAS et BRAF Mutations in Plasma Circulating DNA From Patients With Metastatic Colorectal Cancer	Completed	2016-03-25	2017-05-30	N/A	Any	BRAF	N/A (Sample collecting)	Metastatic Colorectal Cancer	236	N/A	Institut de Cancerologie de Lorraine	NCT02751177
Evaluation of Some Risk Factors Associated With Colorectal Cancer	Not Yet Recruiting	N/A	N/A	N/A	Any	BRAF	N/A (observational)	Colorectal Cancer	100	N/A	Assiut University	NCT05170360
A Prospective Observational Study on Targeted Therapy for Unresectable or Metastatic BRAFV600E Mutant Melanoma Patients	Active, recruiting	2021-02-02	N/A	N/A	Class I	BRAF V600E	N/A (observational)	Melanoma	400	N/A	Pierre Fabre Medicament	NCT04911998
Comparison of In-House Methods and Cobas BRAF V600 Mutation Assay in Melanoma Tumor Samples	Completed	2012-12-01	2013-04-01	N/A	Class I	BRAF V600	N/A (observational)	Melanoma	420	N/A	Hoffmann-La Roche	NCT01744860
cKIT, BRAF/NRAS Mutations in Advanced Melanoma : Clinical Outcome in Response to Tyrosine-kinase Inhibitors - KitMel Project	Completed	2011-01-01	2014-02-01	N/A	Any	BRAF	N/A (observational)	Melanoma	288	0.571	Rennes University Hospital	NCT01543113
Study of Molecular Mechanisms Implicated in the Pathogenesis of Melanoma. Role of Exosomes	Completed	2014-12-01	2023-07-31	N/A	Any	BRAF	N/A (Sample collecting)	Metastatic Melanoma	15	N/A	Centre Hospitalier Universitaire de Nice	NCT02310451
Compassionate Use Program BRAF Mutation-positive Patients in the Adjuvant Treatment of Melanoma After Surgical Resection	Available	N/A	N/A	N/A	Class I	BRAF V600E, BRAF V600K	Dabrafenib + Trametinib	Melanoma	N/A	N/A	Novartis Pharmaceutials	NCT04544202
Technical Optimization of Detection of KRAS, BRAF and NRAS Mutations on Tumor DNA Circulating in Metastatic Colorectal Cancer	Completed	2016-02-03	2017-01-19	N/A	Any	BRAF	N/A (Sample collecting)	Metastatic Colorectal Cancer	30	N/A	Institut de Cancerologie de Lorraine	NCT02827565
Access Study of Trametinib for Subjects With Advanced Unresectable (Stage IIIc) or Distant Metastatic (Stage IV) BRAF V600E/K Mutation Positive Cutaneous Melanoma	No longer available	N/A	N/A	N/A	Class I	BRAF V600E, BRAF V600K	Trametinib	Melanoma	N/A	N/A	GlaxoSmithKline	NCT02416232
Detection of BRAF Mutation on FNAB From Papillary Thyroid Carcinoma	Completed	2014-12-01	2017-07-01	N/A	Any	BRAF	N/A (Sample collecting)	Papillary Thyroid Cancer	53	N/A	University of Aarhus	NCT02561533
A Screening Study to Detect BRAF V600 Mutation-Positive Patients For Enrollment Into Clinical Research Studies of Zelboraf (Vemurafenib)	Completed	2012-12-01	2013-09-01	N/A	Class I	BRAF V600	N/A (observational)	Solid tumor basket trial	662	N/A	Genentech, Inc.	NCT01804140
Effectiveness and Safety of Dabrafenib in Combination With Trametinib as Adjuvant Treatment for Chinese Patients With Stage III BRAF V600 Mutation-positive Melanoma After Complete Resection	Active, recruiting	2020-12-31	N/A	N/A	Class I	BRAF V600	Dabrafenib + Trametinib	Melanoma	80	N/A	Novartis Pharmaceuticals	NCT04666272
Expanded Access to Ulixertinib (BVD-523) in Patients With Advanced MAPK Pathway-Altered Malignancies	Available	N/A	N/A	N/A	Any	BRAF	Ulixertinib (BVD-523)	Solid tumor basket trial	N/A	N/A	xCures	NCT04566393
An Observational Safety Study in Zelboraf (Vemurafenib)-Treated Patients With BRAF-V600 Mutation-Positive Unresectable or Metastatic Melanoma (ZeSS)	Completed	2013-03-23	2016-07-26	N/A	Class I	BRAF V600	Vemurafenib	Melanoma	339	N/A	Hoffmann-La Roche	NCT01990248
Compassionate Use Program to Access Trametinib and Dabrafenib for Patients With BRAF Mutation-positive Metastatic Melanoma	Available	N/A	N/A	N/A	Class I	BRAF V600	Dabrafenib + Trametinib, Dabrafenib, Trametinib	Metastatic Melanoma	N/A	N/A	Novartis Pharmaceuticals	NCT04489433
Single-arm Study to Evaluate the Safety and Efficacy of Sorafenib, in Subjects With BRAF Mutation Refractory Solid Tumors	Completed	2016-05-30	2016-08-09	N/A	Class I	BRAF	Sorafenib	Solid tumor basket trial	1	N/A	Samsung Medical Center	NCT02450149
Real Word European Registry of NTRK Fusions and Other Rare Actionable Fusions (TRacKING)	Active, recruiting	2021-06-22	N/A	N/A	Any	BRAF fusion	N/A (observational)	Basket Trial	500	N/A	Centre Leon Berard	NCT04921553
Detection of Plasmatic Cell-free BRAF and NRAS Mutations : a New Tool for Monitoring Patients With Metastatic Malignant Melanoma Treated With Targeted Therapies or Immunotherapy ( MALT )	Unknown status	N/A	N/A	N/A	Any	BRAF	N/A (observational)	Metastatic Melanoma	35	N/A	Centre Hospitalier Universitaire de Nice	NCT03493230
A Study of Adult Participants With BRAF V600 Mutation-Positive Advanced Melanoma Treated With Cobimetinib (Cotellic®) During the French Early Access Program (Temporary Authorization for Use [TAU])	Completed	2016-10-27	2018-08-22	N/A	Class I	BRAF V600	Cobimetinib + Vemurafenib	Melanoma	200	N/A	Hoffmann-La Roche	NCT03139513
Expanded Access Program (EAP) for Tovorafenib (DAY101) in RAF-Altered, Relapsed or Refractory Low-Grade Glioma	Available	N/A	N/A	N/A	Any	BRAF	Tovorafenib	Low-Grade Glioma	N/A	N/A	Day One Biopharmaceuticals, Inc.	NCT05760586
Biomarkers in Predicting Response to Cetuximab in Patients With Advanced Colorectal Cancer	Completed	2009-11-01	2018-01-01	N/A	Class I	BRAF V600E	N/A (observational)	Colorectal Cancer	1142	N/A	Alliance for Clinical Trials in Oncology	NCT01243372
Biomarkers in Blood Samples From Patients With Refractory Non-Small Cell Lung Cancer Previously Treated With Sorafenib Tosylate	Completed	2010-06-13	2010-07-13	N/A	Any	BRAF	N/A (Sample collecting)	Non-Small Cell Lung Cancer	80	N/A	ECOG-ACRIN Cancer Research Group	NCT01124669
BRAF Inhibitor Encorafenib And Cetuximab Real Life Investigation of Next Generation CRC Treatment	Active, recruiting	2020-09-03	N/A	N/A	Class I	BRAF V600E	Cetuximab + Encorafenib	Metastatic Colorectal Cancer	500	N/A	Pierre Fabre Pharma GmbH	NCT04673955
Combination Chemotherapy and Cetuximab or Bevacizumab in Treating Patients With Metastatic Colorectal Cancer	Terminated	2010-03-01	2014-05-01	N/A	Any	BRAF	Bevacizumab, Cetuximab	Metastatic Colorectal Cancer	3	N/A	Fox Chase Cancer Center	NCT01280643
Managed Access Program Cohort Treatment Plan CTMT212X2002I to Provide Access to Trametinib and Dabrafenib Combination Therapy for Patients With BRAF V600 Mutation-positive Advanced Non-Small Cell Lung CancerManaged Access Program Cohort Treatment Plan CTMT212X2002I to Provide Access to Trametinib and Dabrafenib Combination Therapy for Patients With BRAF V600 Mutation-positive Advanced Non-Small C…	Available	N/A	N/A	N/A	Class I	BRAF V600E, BRAF V600K	Dabrafenib + Trametinib	Non-Small Cell Lung Cancer	N/A	N/A	Novartis Pharmaceuticals	NCT04507919
Adjuvant Dabrafenib and Trametinib Treatment in Patients With Completely Resected High-risk Stage III Melanoma.	Active, recruiting	2021-12-01	N/A	N/A	Class I	BRAF V600E	Dabrafenib + Trametinib	Melanoma	84	N/A	Novartis Pharmaceuticals	NCT04961619
Combining Talimogene Laherparepvec With BRAF and MEK Inhibitors in BRAF Mutated Advanced Melanoma	Unknown status	2017-06-25	N/A	Phase I	Any	BRAF	Talimogene laherparepvec, dabrafenib, trametinib	Melanoma	4	N/A	West Cancer Center	NCT03088176
Nilotinib Plus Dabrafenib/Trametinib in Metastatic Melanoma	Active, recruiting	2022-06-01	N/A	Phase I	Class I	BRAF V600	Nilotinib, Dabrafenib, Trametinib	Metastatic Melanoma	15	N/A	Jill M Kolesar	NCT04903119
Dabrafenib, Trametinib, and IMRT in Treating Patients With BRAF Mutated Anaplastic Thyroid Cancer	Active, recruiting	2020-09-14	N/A	Phase I	Class I	BRAF V600E, BRAF V600K	Dabrafenib, Trametinib, IMRT	Thyroid Anaplastic Carcinoma	6	N/A	City of Hope Medical Center	NCT03975231
A Study of ABM-1310 in Patients With BRAF V600-Mutant Advanced Solid Tumors	Active, recruiting	2022-09-01	N/A	Phase I	Class I	BRAF V600	ABM-1310	Basket Trial	72	N/A	ABM Therapeutics Shanghai Company Limited, Shanghai East Hospital	NCT05501912
Continued Access to RXDX-105	Completed	2018-12-14	2020-09-30	Phase I	Class I	BRAF V600E	RXDX-105	Colorectal Cancer	3	N/A	Memorial Sloan Kettering Cancer Center	NCT03784378
Study of an Oral Cdk Inhibitor Administered With an Oral BRAF Inhibitor in Patients With Advanced or Inoperable Malignant Melanoma With BRAF Mutation	Suspended	2013-08-01	N/A	Phase I	Any	BRAF	P1446A-05, Vemurafenib	Melanoma	100	N/A	Piramal Enterprises Limited	NCT01841463
Safety and Tolerability of ABM-1310 in Patients With Advanced Solid Tumors	Active, recruiting	2020-06-16	N/A	Phase I	Any	BRAF	ABM-1310, Cobimetinib	Basket Trial	112	N/A	ABM Therapeutics Corporation, M.D. Anderson Cancer Center	NCT04190628
Vemurafenib With Sorafenib Tosylate or Crizotinib in Treating Patients With Advanced Malignancies With BRAF Mutations	Completed	2012-02-06	2021-01-13	Phase I	Any	BRAF	Crizotinib, Sorafenib, Vemurafenib	Basket Trial	46	N/A	M.D. Anderson Cancer Center	NCT01531361
Dabrafenib in Treating Patients With Solid Tumors and Kidney or Liver Dysfunction	Terminated	2013-08-23	2015-12-16	Phase I	Class I	BRAF V600	Dabrafenib	Solid tumors + kidney or liver dysfunction	8	N/A	National Cancer Institute (NCI)	NCT01907802
Phase 1 Safety Study of Encorafenib in Chinese Patients With Advanced Metastatic BRAF V600E Mutant Solid Tumors	Completed	2021-09-27	2022-05-06	Phase I	Class I	BRAF V600E	Encorefanib	Metastatic Melanoma, Metastatic NSCLC	3	N/A	Pierre Fabre Medicament	NCT05003622
BRAF V600E Mutations In Papillary Thyroid Carcinoma	Unknown status	2011-07-01	N/A	Phase I	Class I	BRAF V600E	N/A (observational)	Papillary Thyroid Carcinoma	150	N/A	Bezmialem Vakif University	NCT01417442
Hepatic Impairment Study of Encorafenib in Combination With Binimetinib in BRAF Melanoma	Withdrawn	2021-01-21	N/A	Phase I	Class I	BRAF V600	Binimetinib + Encorafanib	Melanoma	N/A	N/A	Pierre Fabre Medicament	NCT04759846
Ph I Ipilimumab Vemurafenib Combo in Patients With v-Raf Murine Sarcoma Viral Oncogene Homolog B1 (BRAF)	Terminated	2011-11-01	2013-12-01	Phase I	Class I	BRAF V600	Ipilimumab, Vemurafenib	Melanoma	18	N/A	Bristol-Myers Squibb	NCT01400451
A Study of BDTX-4933 in Patients With BRAF and Select RAS/MAPK Mutation-Positive Cancers	Active, recruiting	2023-04-18	N/A	Phase I	Any	BRAF	BDTX-4933	Basket Trial	140	N/A	Black Diamond Therapeutics, Inc.	NCT05786924
A Rollover Study to Provide Continued Treatment With GSK2118436 to Subjects With BRAF Mutation-Positive Tumors	Completed	2010-11-05	2018-04-09	Phase I	Any	BRAF	GSK2118436, GSK1120212	Basket Trial	214	N/A	Novartis Pharmaceutials	NCT01231594
A Study to Evaluate KIN-2787 in Participants With BRAF and/or NRAS Mutation Positive Solid Tumors	Active, recruiting	2021-08-04	N/A	Phase I	Any	BRAF	KIN-2787, KIN-2787 + Binimetinib	Solid tumor basket trial	400	N/A	Kinnate Biopharma	NCT04913285
Study of Safety, Pharmacokinetics, and Antitumor Activity of BGB-3245 in Participants With Advanced or Refractory Tumors	Active, recruiting	2020-02-17	N/A	Phase I	Any	BRAF	BGB-3245	Solid tumor basket trial	114	N/A	MapKure, LLC	NCT04249843
A Study to Investigate the Effect of Itraconazole and Rifampin on Pharmacokinetics (PK) of Vemurafenib at Steady State	Completed	2016-05-26	2018-09-10	Phase I	Class I	BRAF V600	Itraconazole, Rifampin, Vemurafenib	Metastatic Melanoma	32	N/A	Genetech, Inc.	NCT02608034
Dose Escalation Study of ARQ 736 in Adult Subjects With Advanced Solid Tumors Harboring BRAF and/or NRAS Mutations	Completed	2010-10-01	2013-03-01	Phase I	Any	BRAF	ARQ736	Solid tumor basket trial	24	N/A	ArQule, Inc.	NCT01225536
Bioequivalence Binimetinib 3 x 15 mg and 45 mg Formulations	Completed	2022-08-31	2023-01-18	Phase I	Class I	BRAF V600	Binimetinib	Melanoma	37	N/A	Pierre Fabre Medicament	NCT05810740
Relative Bioavailability of Binimetinib 3 x 15 mg and 45 mg Formulations	Unknown status	2021-09-03	N/A	Phase I	Class I	BRAF V600	Binimetinib	Melanoma	14	N/A	Pierre Fabre Medicament	NCT05103891
A PhaseI Study of HL-085 Plus Vemurafenib in Solid Tumor With BRAF V600 Mutation	Active, recruiting	2018-07-01	N/A	Phase I	Class I	BRAF V600	HL-085 + Vemurafenib	Solid tumor basket trial	45	N/A	Shanghai Kechow Pharma, Inc.	NCT03781219
Adjuvant Therapy Based on Pathologic Response After Neoadjuvant Encorafenib Binimetinib in Melanoma	Active, recruiting	2021-05-24	N/A	Phase I	Class I	BRAF V600	Binimetinib + Encorafanib, Nivolumab	Melanoma	50	N/A	H. Lee Moffitt Cancer Center and Research Institute	NCT04741997
Bioavailability Study of Vemurafenib in Participants With BRAF^V600 Mutation-Positive Malignancies	Completed	2015-08-13	2017-01-09	Phase I	Class I	BRAF V600	Vemurafenib	Melanoma	6	N/A	Hoffmann-La Roche	NCT02441465
Ipilimumab With or Without Dabrafenib, Trametinib, and/or Nivolumab in Treating Patients With Melanoma That Is Metastatic or Cannot Be Removed by Surgery	Terminated	2013-08-28	2022-03-04	Phase I	Class I	BRAF V600E, BRAF V600K	Dabrafenib, Ipilimumab, Nivolumab, Trametinib	Melanoma	15	N/A	National Cancer Institute (NCI)	NCT01940809
A Study to Evaluate the Effect of Repeat Oral Dosing of GSK2118436 on Cardiac Repolarization in Subjects With V600 BRAF Mutation-Positive Tumors	Completed	2013-01-22	2014-11-28	Phase I	Class I	BRAF V600	GSK2118436	Basket Trial	50	N/A	GlaxoSmithKline	NCT01738451
XL888 + Vemurafenib + Cobimetinib for Unresectable BRAF Mutated Stage III/IV Melanoma	Active, not recruiting	2016-09-07	N/A	Phase I	Class I	BRAF V600	Cobimetinib + Vemurafenib + XL888	Melanoma	26	N/A	H. Lee Moffitt Cancer Center and Research Institute	NCT02721459
A Pharmacokinetics (PK) Study of the Effects Rabeprazole and Rifampin on Dabrafenib in Subjects With BRAF V600 Mutation Positive Tumors	Completed	2013-12-20	2016-02-29	Phase I	Class I	BRAF V600	Dabrafenib, Dabrafenib + Rabeprazole, Dabrafenib + Rifampin	Basket Trial	23	N/A	GlaxoSmithKline	NCT01954043
A Phase I Study to Investigate the Safety, Tolerability and Pharmacokinetic Profile of of GSK2118436 in Japanese Subjects With BRAF Mutation Positive Solid Tumors	Completed	2012-05-11	2015-04-16	Phase I	Class I	BRAF V600E, BRAF V600K	GSK2118436	Solid tumor basket trial	12	0.58	GlaxoSmithKline	NCT01582997
Vemurafenib in Combination With Everolimus or Temsirolimus With Advanced Cancer	Completed	2012-12-18	2020-06-01	Phase I	Any	BRAF	Everolimus, Temsirolimus, Vemurafenib	Solid tumor basket trial	27	N/A	M.D. Anderson Cancer Center	NCT01596140
An Open Label Study to Examine the Effects of a High-Fat Meal and Particle Size on the Pharmacokinetics of Orally Administered GSK2118436 in Subjects With BRAF Mutation Positive Tumor	Completed	2010-10-21	2011-05-13	Phase I	Any	BRAF	GSK2118436	Basket Trial	28	N/A	GlaxoSmithKline	NCT01231568
A Phase I Study of Oral LGX818 in Adult Patients With Advanced or Metastatic BRAF Mutant Melanoma	Completed	2011-09-05	2022-11-07	Phase I	Class I	BRAF V600	LGX818	Melanoma	93	N/A	Pfizer	NCT01436656
Phase II Biomarker Study Comparing the Combination of BRAF Inhibitor Dabrafenib With MEK Inhibitor Trametinib Versus the Combination After Monotherapy With Dabrafenib or Trametinib	Terminated	2013-11-13	2017-01-19	Phase I	Class I	BRAF V600E, BRAF V600K	Dabrafenib, Onalespib, Trametinib	Basket Trial	22	N/A	National Cancer Institute (NCI)	NCT02097225
Vemurafenib and Panitumumab Combination Therapy in Patients With BRAF V600E Mutated Metastatic Colorectal Cancer	Completed	2013-01-01	2015-03-01	Phase I	Class I	BRAF V600E	Panitumumab + Vemurafenib	Metastatic Colorectal Cancer	16	N/A	Memorial Sloan Kettering Cancer Center	NCT01791309
Tolerability and Safety of Vemurafenib, Cetuximab Combined With Camrelizumab for BRAF V600E-mutated /MSS Metastatic Colorectal Cancer	Active, recruiting	2021-08-15	N/A	Phase I	Class I	BRAF V600E	Camrelizumab + Cetuximab + Vemurafenib	Metastatic Colorectal Cancer	12	N/A	West China Hospital	NCT05019534
Expansion Study to Evaluate the Efficacy and Safety of HM95573 in BRAF, KRAS or NRAS Mutant Solid Cancers	Completed	2017-05-19	2020-02-04	Phase I	Any	BRAF	HM95573	Solid tumor basket trial	65	N/A	Hanmi Pharmaceutical Company Limited	NCT03118817
A Study of Vemurafenib (Zelboraf) in Chinese Participants With BRAF V600 Mutation-Positive Unresectable or Metastatic Melanoma	Completed	2013-08-17	2018-04-20	Phase I	Class I	BRAF V600	Vemurafenib	Melanoma	46	0.522	Hoffmann-La Roche	NCT01910181
A Study of The Impact of Severe Hepatic Impairment on the Pharmacokinetics and Safety of Vemurafenib in BRAF V600 Mutation-Positive Cancer Participants	Completed	2013-08-20	2017-04-20	Phase I	Class I	BRAF V600	Vemurafenib	Solid tumor basket trial	8	N/A	Hoffmann-La Roche	NCT01767623
Study of Dabrafenib +/- Trametinib in Combination With Ipilimumab for V600E/K Mutation Positive Metastatic or Unresectable Melanoma	Completed	2013-02-12	2015-09-04	Phase I	Class I	BRAF V600E, BRAF V600K	Dabrafenib + Ipilimumab +Trametinib, Dabrafenib + Ipilimumab	Melanoma	38	0.64	GlaxoSmithKline	NCT01767454
Determination of the Absolute Bioavailability of GSK2118436 Following a Single Oral Dose Co-Administered With an Intravenous Radiolabelled Microtracer of GSK2118436 in Subjects With BRAF Mutant Solid Tumors	Completed	2011-06-08	2011-09-12	Phase I	Any	BRAF	GSK2118436	Solid tumor basket trial	6	N/A	GlaxoSmithKline	NCT01340833
Effects of Dabrafenib on the Single Dose Pharmacokinetics (PK) of Rosuvastatin and Midazolam	Completed	2015-02-19	2016-08-01	Phase I	Class I	BRAF V600	Dabrafenib + Midazolam + Rosuvastatin	Basket Trial	6	N/A	GlaxoSmithKline	NCT02082665
Vemurafenib Plus Copanlisib in Radioiodine-Refractory (RAIR) Thyroid Cancers	Active, not recruiting	2020-06-26	N/A	Phase I	Class I	BRAF V600	Copanlisib + Vemurafenib	Thyroid Cancer	8	N/A	Memorial Sloan Kettering Cancer Center	NCT04462471
JSI-1187-01 Monotherapy and in Combination With Dabrafenib for Advanced Solid Tumors With MAPK Pathway Mutations	Suspended	2020-06-18	N/A	Phase I	Any	BRAF	Dabrafenib + JSI-1187-01, JSI-1187-01	Solid tumor basket trial	124	N/A	JS InnoPharm, LLC	NCT04418167
Vemurafenib Combined With Whole Brain Radiation Therapy or Radiosurgery in Patients With BRAF Mutation-Positive Melanoma and Brain Metastases	Withdrawn	N/A	N/A	Phase I	Class I	BRAF V600	Vemurafenib	Melanoma	N/A	N/A	Sidney Kimmel Cancer Center at Thomas Jefferson University	NCT02145910
Study of EGF816 in Combination With Selected Targeted Agents in EGFR-mutant NSCLC	Active, not recruiting	2018-01-29	N/A	Phase I	Not Mentioned	Not Mentioned	non-BRAF study, N/A	Non-Small Cell Lung Cancer	105	N/A	Novartis Pharmaceuticals	NCT03333343
E6201 Plus Dabrafenib for the Treatment of Metastatic Melanoma Central Nervous System Metastases (CNS)	Terminated	2018-07-02	2021-10-11	Phase I	Class I	BRAF V600	Dabrafenib + E6201, E6201	Metastatic Melanoma	4	N/A	Spirita Oncology, LLC	NCT03332589
A Study of the Effect of Food on the Pharmacokinetics of Single Dose RO5185426 And the Safety And Efficacy of Continuous Administration in Patients With BRAF V600E Mutation-Positive Metastatic Melanoma	Completed	2011-01-01	2013-05-01	Phase I	Class I	BRAF V600E	RO5185426	Metastatic Melanoma	16	0.643	Hoffmann-La Roche	NCT01264380
Phase 1 Safety and Tolerability of MEDI4736 in Combination With Dabrafenib and Trametinib or With Trametinib Alone	Completed	2013-12-20	2018-04-24	Phase I	Class I	BRAF V600E, BRAF V600K	Dabrafenib + Durvalumab + Trametinib, Durvalumab + Trametinib	Melanoma	68	0.692	MedImmune LLC	NCT02027961
Leflunomide+Vemurafenib in V600 Mutant Met. Melanoma	Terminated	2012-07-01	2014-01-01	Phase I	Class I	BRAF V600	Leflunomide + Vemurafenib	Metastatic Melanoma	3	N/A	Massachusetts General Hospital	NCT01611675
A Study of Vemurafenib and GDC-0973 (Cobimetinib) in Participants With BRAFV600E Mutation-Positive Metastatic Melanoma	Completed	2011-02-17	2013-10-01	Phase I	Class I	BRAF V600E	Cobimetinib + Vemurafenib, Cobimetinub	Metastatic Melanoma	131	0.873	Hoffmann-La Roche	NCT01271803
A Phase 1b Study of Atezolizumab in Combination With Vemurafenib or Vemurafenib Plus Cobimetinib in Participants With BRAFV600-Mutation Positive Metastatic Melanoma	Completed	2012-08-13	2020-03-25	Phase I	Class I	BRAF V600	Atezolizumab + Cobimetinib + Vemurafenib, Atezolizumab + Vemurafenib	Metastatic Melanoma	67	0.718	Genentech, Inc.	NCT01656642
Study of RXDX-105, Potent RET Inhibitor in Patients With Advanced Lung Cancer and Other Solid Tumors	Completed	2013-06-01	2019-02-01	Phase I	Any	BRAF	RXDX-105	Solid tumor basket trial	143	N/A	Hoffmann-La Roche	NCT01877811
Study of Vemurafenib, Carboplatin, and Paclitaxel	Completed	2012-07-09	2020-04-21	Phase I	Any	BRAF	Carboplatin + Paclitaxel + Vemurafenib	Lymphoma, Solid Tumors	21	N/A	M.D. Anderson Cancer Center	NCT01636622
PF-07284892 in Participants With Advanced Solid Tumors	Active, recruiting	2021-03-17	N/A	Phase I	Class I, III	BRAF V600E, BRAF	PF-07284892, PF-07284892 + Binimetinib, Cetuximab, Encorafenib, Lorlatinib	Solid tumor basket trial	196	N/A	Pfizer	NCT04800822
A Study of LGK974 in Patients With Malignancies Dependent on Wnt Ligands	Active, not recruiting	2011-12-01	N/A	Phase I	Any	BRAF	LGK974 + PDR001, LGK974	Solid tumor basket trial	185	N/A	Novartis Pharmaceuticals	NCT01351103
A Phase Ib Study of MEK162 Plus BYL719 in Adult Patients With Selected Advanced Solid Tumors	Completed	2012-03-01	2017-08-15	Phase I	Not Mentioned	Not Mentioned	BYL719 + MEK162	Solid tumor basket trial	139	N/A	Array BioPharma	NCT01449058
A Phase Ib/II Study of LGX818 in Combination With MEK162 in Adult Patients with BRAF Dependent Advanced Solid Tumors	Completed	2012-05-28	2023-03-09	Phase I & II	Class I	BRAF V600	LGX818, MEK162, LEE011	Solid tumor basket trial	189	0.67	Pfizer	NCT01543698
XP-102 and XP-102 in Combination With Trametinib in Advanced Solid Tumor Patients With a BRAF V600 Mutation	Not Yet Recruiting	N/A	N/A	Phase I & II	Class I	BRAF V600	Trametinib, XP-102	Solid tumor basket trial	221	N/A	Xynomic Pharmaceuticals, Inc.	NCT053275374
A Phase Ib/II Clinical Trial to Evaluate the Safety and Efficacy of HLX208+HLX10 in NSCLC With BRAF V600E Mutation	Active, recruiting	2023-02-28	N/A	Phase I & II	Class I	BRAF V600	HLX208 + HLX10	Non-Small Cell Lung Cancer	49	N/A	Shanghai Henlius Biotech	NCT05641493
HDAC Inhibitor Vorinostat in Resistant BRAF V600 Mutated Advanced Melanoma	Unknown status	2016-06-01	N/A	Phase I & II	Class I	BRAF V600	Vorinostat	Melanoma	22	N/A	The Netherlands Cancer Institute	NCT02836548
Tovorafenib (DAY101) Monotherapy or in Combination With Other Therapies for Patients With Melanoma and Other Solid Tumors	Active, recruiting	2021-07-15	N/A	Phase I & II	Any	BRAF fusion	Pimasertib, Tovorafenib	Solid tumor basket trial	168	N/A	Day One Biopharmaceuticals, Inc.	NCT04985604
BRAF/MEK/EGFR Inhibitor Combination Study in Colorectal Cancer (CRC)	Completed	2012-12-19	2020-06-18	Phase I & II	Class I	BRAF V600E	Dabrafenib, Panitumumab, Trametinib, 5-fluorouracil	Colorectal Cancer	166	0.67	Novartis Pharmaceutials	NCT01750918
The Efficacy and Safety of HLX208 in Advanced Anaplastic Thyroid Cancer (ATC) With BRAF V600 Mutation	Active, not recruiting	2021-12-10	N/A	Phase I & II	Class I	BRAF V600	HLX208	Anaplastic Thyroid Cancer	25	N/A	Shanghai Henlius Biotech	NCT05102292
Study of WNT974 in Combination With LGX818 and Cetuximab in Patients With BRAF-mutant Metastatic Colorectal Cancer (mCRC) and Wnt Pathway Mutations	Completed	2014-12-01	2017-06-23	Phase I & II	Class I	BRAF V600	Cetuximab + LGX818 + WNT974	Metastatic Colorectal Cancer	20	N/A	Array BioPharma	NCT02278133
Safety and Efficacy in Participants With Metastatic BRAF-mutant Melanoma Treated With Encorafenib With and Without Binimetinib in Combination With Nivolumab and Low-dose Ipilimuma	Active, not recruiting	2021-05-28	N/A	Phase I & II	Class I	BRAF V600E, BRAF V600K	Binimetinib + Encorafenib + Ipilimumab + Nivolumab, Encorafenib + Ipilimumab + Nivolumab	Melanoma	2	N/A	Jason J. Luke, MD	NCT04655157
A Study to Determine Safety, Tolerability and Pharmacokinetics of Oral Dabrafenib In Children and Adolescent Subjects	Completed	2013-05-23	2020-12-04	Phase I & II	Class I	BRAF V600	Dabrafenib	Brain Tumor	85	0.833	Novartis Pharmaceuticals	NCT01677741
A Phase 1/2 Study of DCC-3116 in Patients With MAPK Pathway Mutant Solid Tumors	Active, recruiting	2021-06-15	N/A	Phase I & II	Any	RAF	DCC-3116 + Binimetinib, DCC-3116 + Sotorasib, DCC-3116 + Trametinib, DCC-3116	Solid tumor basket trial	323	N/A	Deciphera Pharmaceuticals LLC	NCT04892017
A Single Agent Study to Evaluate the Overall Response Rate, Safety and Tolerability of Orally Administered Vemurafenib	Withdrawn	2014-07-01	2017-07-01	Phase I & II	Any	BRAF	Vemurafenib	Multiple Myeloma	N/A	N/A	University of Arkansas	NCT02115035
Radiotherapy & Combi in Metastatic Melanoma	Completed	2015-05-01	2020-04-17	Phase I & II	Class I	BRAF V600E, BRAF V600K	Dabrafenib + Trametinib	Metastatic Melanoma	10	N/A	Melanoma and Skin Cancer Trials Limited	NCT02392871
Dose-Esc/Exp RMC4630 & Cobi in Relapsed/Refractory Solid Tumors & RMC4630& Osi in EGFR+ Locally Adv/Meta NSCLC	Completed	2019-07-02	2022-02-08	Phase I & II	Class III	BRAF	Cobimetinib + RMC-4630	Basket Trial	113	0.0182	Resolution Medicines, Inc.	NCT03989115
A Study of ERAS-007 in Patients With Advanced Gastrointestinal Malignancies	Active, recruiting	2021-09-20	N/A	Phase I & II	Class I	BRAF V600E	Cetuximab + Encorafenib + ERAS-007	Metastatic Colorectal Cancer	200	N/A	Erasca, Inc.	NCT05039177
The Efficacy of HLX208 (BRAF V600E Inhibitor) for Refractory Primary Brain Tumors With BRAF Mutation After First-line Treatment	Active, recruiting	2021-12-23	N/A	Phase II	Any	BRAF	HLX208	Brain Tumor (Primary)	40	N/A	Shanghai Henlius Biotech	NCT05092802
Study of Ulixertinib for Patients With Advanced Malignancies Harboring MEK or Atypical BRAF Alterations	Active, not recruiting	2017-06-25	N/A	Phase II	Class II, III	Non-V600	Ulixertinib (BVD-523)	Basket Trial	101	N/A	Biomed Valley Discoveries, Inc	NCT04488003
Dabrafenib and Trametinib in Treating Patients With BRAF Mutated Ameloblastoma	Completed	2017-07-17	2019-06-26	Phase II	Any	Dabrafinib-sensitive BRAF	Dabrafenib, Trametinib	Ameloblastoma	1	N/A	Novartis Pharmaceuticals, Stanford University	NCT02367859
Dabrafenib and Trametinib in People With BRAF V600E Mutation Positive Lesions in Erdheim Chester Disease	Completed	2014-11-01	2018-08-29	Phase II	Class I	BRAF V600E, BRAF V600K	Dabrafenib, Trametinib	Erdheim Chester Disease	9	0.667	National Human Genome Research Institute	NCT02281760
Study of Cemiplimab Combined With Dabrafenib and Trametinib in People With Anaplastic Thyroid Cancer	Active, recruiting	2020-01-20	N/A	Phase II	Class I	BRAF V600E	Dabrafenib, Trametinib	Anaplastic Thyroid Cancer	15	N/A	Memorial Sloan Kettering Cancer Center	NCT04238624
A Basket Trial of an ERK1/2 Inhibitor (LY3214996) in Combination With Abemaciclib	Active, recruiting	2020-10-05	N/A	Phase II	Any	BRAF	Abemaciclib, LY3214996	Basket Trial	35	N/A	Indiana University, Eli Lilly and Company	NCT04534283
Neoadjuvant and Adjuvant Targeted Treatment in NSCLC With BRAF V600 or MET Exon 14 Mutations	Not Yet Recruiting	N/A	N/A	Phase II	Class I	BRAF V600	Dabrafenib + Trametinib, Capmatinib	Non-Small Cell Lung Cancer	40	N/A	Sun Yat-sen University	NCT06054191
Neoadjuvant and Adjuvant Targeted Treatment in NSCLC With BRAF V600 or MET Exon 14 Mutations	Withdrawn	2019-06-24	2020-02-03	Phase II	Any mutant (no WT BRAF)	BRAF mutants	Talimogene laherparepvec, dabrafenib, trametinib	Melanoma	n/a	N/A	TriHealth Inc.	NCT03972046
Vemurafenib and Cobimetinib in Treating Patients With BRAF V600E Mutation Positive Craniopharyngioma	Active, recruiting	2017-08-04	N/A	Phase II	Class I	BRAF V600E	Cobimetinib, Vemurafenib	Papillary Craniopharyngioma	36	N/A	Alliance for Clinical Trials in Oncology, Massachusetts General Hospital	NCT03224767
Neoadjuvant Encorafenib, Binimetinib and Cetuximab for Patients With BRAF V600E Mutated/pMMR Localized Colorectal Cancer	Active, recruiting	2022-09-01	N/A	Phase II	Class I	BRAF V600E	Binimetinib, Cetuximab, Encorafenib	Colorectal Cancer	48	N/A	AIO-Studien-gGmbH, Hämatologisch-Onkologische Praxis Eppendorf	NCT05510895
Dabrafenib Plus Trametinib in Patients With Advanced Solid Tumor Having BRAF V600E Mutation or Clinically Actionable BRAF Gene Alterations	Not Yet Recruiting	N/A	N/A	Phase II	Any	BRAF	Dabrafenib, Trametinib	Basket Trial	30	N/A	Seoul St. Mary's Hospital, The Catholic University of Korea	NCT05876806
Encorafenib Plus Cetuximab in a Neoadjuvant Setting in Patients With BRAF Mutation Localised Colon or Upper Rectum Cancer	Active, recruiting	2023-02-13	N/A	Phase II	Class I	BRAF V600E	Cetuximab, Encorafenib	Colorectal Cancer	30	N/A	Federation Francophone de Cancerologie Digestive, Paris HEGP	NCT05706779
Selumetinib in Cancers With BRAF Mutations	Completed	2009-07-01	2015-01-01	Phase II	Any	BRAF	Selumetinib	Adult Solid Neoplasm	28	N/A	National Cancer Institute (NCI)	NCT00888134
Vemurafenib Plus Cobimetinib After Radiosurgery in Patients With BRAF-mutant Melanoma Brain Metastases	Terminated	2018-07-01	2023-02-10	Phase II	Class I	BRAF V600	Cobimetinib, Vemurafenib	Melanoma Brain Metastases	20	N/A	Technische Universitat Dresden	NCT03430947
Dabrafenib and Trametinib in Patients With Non-small Cell Lung Cancer Harboring V600E BRAF Mutation	Unknown status	N/A	N/A	Phase II	Class I	BRAF V600E	Dabrafenib + Trametinib	Non-Small Cell Lung Cancer	27	N/A	Asan Medical Center	NCT03543306
Binimetinib Encorafenib Pembrolizumab +/- Stereotactic Radiosurgery in BRAFV600 Melanoma With Brain Metastasis	Active, recruiting	2022-09-05	N/A	Phase II	Class I	BRAF V600	Binimetinib, Encorafenib, Pembrolizumab	Melanoma Brain Metastases	150	N/A	UNICANCER	NCT04074096
Binimetinib and Encorafenib for the Treatment of Advanced Solid Tumors With Non-V600E BRAF Mutations	Active, not recruiting	2019-06-07	N/A	Phase II	Class II, III	Non-V600E	Binimetinib + Encorafanib	Solid tumor basket trial	26	N/A	University Health Networrk, Toronto	NCT3839342
A Study of Avutometinib (VS-6766) + Defactinib in Recurrent KRAS G12V, Other KRAS and BRAF Non-Small Cell Lung Cancer	Active, recruiting	2020-12-31	N/A	Phase II	Any	BRAF	Avutometinib, Avutometinib + Defactinib	Non-Small Cell Lung Cancer	100	N/A	Verastem, Inc.	NCT04620330
Dabrafenib/Trametinib, BRAF or BRAF AND MEK Pre-op With BRAF and MEK Post-op, Phase IIB, Melanoma With Brain Mets,Biomarkers and Metabolites	Terminated	2014-04-08	2017-04-26	Phase II	Class I	BRAF V600E, BRAF V600K	Dabrafenib, Dabrafenib + Trametinib	Melanoma Brain Metastases	6	N/A	GlaxoSmithKline	NCT01978236
To Evaluate the Efficacy Beyond Progression of Vemurafenib+Cobimetinib Associated With Local Treatment Compared to Second-line Treatment in Patients With BRAFV600+ Metastatic Melanoma in Focal Progression With First-line+Vemurafenib+Cobimetinib.	Active, not recruiting	2018-06-18	N/A	Phase II	Class I	BRAF V600	Nivolumab, Pembrolizumab	Metastatic Melanoma	120	N/A	Intergruppo Melanoma Italiano	NCT03514901
Evaluation of Photosensitivity in Dabrafenib or Vemurafenib Treated Metastatic Melanoma Patients - a Phase IIa/IIb Study	Terminated	2014-01-01	2014-12-15	Phase II	Class I	BRAF V600	Dabrafenib, Vemurafenib	Metastatic Melanoma	8	N/A	University Hospital Tuebingen	NCT02052193
A Phase II Clinical Trial to Evaluate HLX208 in Advanced Solid Tumor Patients With BRAF V600 Mutation	Not Yet Recruiting	N/A	N/A	Phase II	Class I	BRAF V600	HLX208	Solid tumor basket trial	30	N/A	Shanghai Henlius Biotech	NCT05528406
Study to Determine the Effectiveness of GSK1120212 in BRAF Mutation-positive Melanoma Previously Treated With or Without a BRAF Inhibitor	Completed	2009-11-01	2013-01-01	Phase II	Class I	BRAF V600E, BRAF V600K, BRAF V600D	GSK1120212	Melanoma	97	0.25	GlaxoSmithKline	NCT01037127
Testing Trametinib as a Potential Targeted Treatment in Cancers With BRAF Genetic Changes (MATCH-Subprotocol R)	Active, not recruiting	2015-08-12	N/A	Phase II	Class II, III	Non-V600 BRAF	Trametinib	Basket Trial	35	N/A	National Cancer Institute (NCI)	NCT04439279
LCCC 1128: Open Label Phase II Trial of the BRAF Inhibitor (Dabrafenib) and the MEK Inhibitor (Trametinib) in Unresectable Stage III and Stage IV BRAF Mutant Melanoma; Correlation of Resistance With the Kinome and Functional Mutations	Completed	2013-04-04	2020-09-17	Phase II	Class I	BRAF V600E, BRAF V600K	Dabrafenib + Trametinib	Melanoma	17	0.76	UNC Lineberger Comprehensive Cancer Center	NCT01726738
Study to Evaluate Treatment of Dabrafenib Plus Trametinib in Subjects With BRAF Mutation-Positive Melanoma That Has Metastasized to the Brain	Completed	2014-02-21	2018-02-14	Phase II	Class I	BRAF V600E, BRAF V600K, BRAF V600D, BRAF V600R	Dabrafenib + Trametinib	Melanoma Brain Metastases	127	0.647	Novartis Pharmaceutials	NCT02039947
The Efficacy of HLX208 (BRAF V600E Inhibitor) With Cetuximab for Metastatic Colorectal Cancer (mCRC) With BRAF V600E Mutation After First-line Treatment	Active, not recruiting	2021-08-11	N/A	Phase II	Class I	BRAF V600E	HLX208 + Cetuximab	Colorectal Cancer	50	N/A	Shanghai Henlius Biotech	NCT04984369
Hydroxychloroquine in Combination With Encorafenib and Cetuximab or Panitumumab in the Treatment of Metastatic BRAF-mutated Colorectal Cancer Refractory	Active, recruiting	2022-10-10	N/A	Phase II	Class I	BRAF V600E	Hydroxychloroquine + Encorafenib + Cetuximab, Panitumumab	Metastatic Colorectal Cancer	43	N/A	Northwestern University	NCT05576896
A Combination of Vemurafenib, Cytarabine and 2-chlorodeoxyadenosine in Children With LCH and BRAF V600E Mutation	Active, recruiting	2018-06-26	N/A	Phase II	Class I	BRAF V600E	Cytarabine + Vemurafenib + 2-chlorodeoxyadenosine	Langerhans Cell Histiocytosis	12	N/A	Federal Research Institute of Pediatrtic Hematology, Oncology and Immunology	NCT03585686
The Effects of Treatment With Vemurafenib on the Immune System in Advanced Melanoma	Terminated	2013-09-01	2015-11-01	Phase II	Class I	BRAF V600	Vemurafenib	Melanoma	3	N/A	Philip Friedlander	NCT01942993
Dabrafenib and Trametinib in Treating Patients With Erdheim Chester Disease With BRAF V600 Mutations	Withdrawn	2019-01-04	2021-02-18	Phase II	Class I	BRAF V600	Dabrafenib + Trametinib	Erdheim Chester Disease	N/A	N/A	National Cancer Institute (NCI)	NCT03794297
Treatment of BRAF ( B-Rapidly Accelerated Fibrosarcoma) Mutated Papillary Craniopharyngioma	Active, recruiting	N/A	N/A	Phase II	Class I	BRAF V600E	Dabrafenib + Trametinib	Papillary Craniopharyngioma	25	N/A	Eva Marie Erfurth, MD, PhD	NCT05525273
A Phase II Study of Single Agent MEK162 in Patients With Advanced Melanoma	Completed	2011-03-24	2023-02-06	Phase II	Class I	BRAF V600E	MEK162	Metastatic Melanoma	183	0.12	Pfizer	NCT01320085
HL-085+Vemurafenib to Treat Advanced Melanoma Patients With BRAF V600E/K Mutation	Active, recruiting	2021-09-06	N/A	Phase II	Class I	BRAF V600E, BRAF V600K	HL-085 + Vemurafenib	Melanoma	104	N/A	Shanghai Kechow Pharma, Inc.	NCT05263453
A Study of Vemurafenib in Participants With BRAF V600 Mutation-Positive Cancers	Completed	2012-04-12	2016-10-28	Phase II	Class I	BRAF V600	Cetuximab, Vemurafenib	Solid tumors, multiple myeloma	208	0.615	Hoffmann-La Roche	NCT01524978
Trametinib in Treating Patients With Advanced Melanoma With BRAF Non-V600 Mutations	Completed	2015-01-01	2021-04-16	Phase II	Class II, III	Non-V600 BRAF	Trametinib	Melanoma	9	0.66	Vanderbilt-Ingram Cancer Center	NCT02296112
Study of Selective BRAF Kinase Inhibitor Dabrafenib Monotherapy Twice Daily and in Combination With Dabrafenib Twice Daily and Trametinib Once Daily in Combination Therapy in Subjects With BRAF V600E Mutation Positive Metastatic (Stage IV) Non-small Cell Lung Cancer.	Completed	2011-08-05	2021-01-07	Phase II	Class I	BRAF V600E	Dabrafenib, Dabrafenib + Trametinib	Metastatic NSCLC	177	0.684	Novartis Pharmaceutials	NCT01336634
Japan PhI/II of GSK2118436 and GSK1120212 Combination in Subjects With BRAF V600E/K Mutation Positive Advanced Solid Tumors (Phase I Part) or Cutaneous Melanoma (Phase II Part)	Completed	2013-08-15	2016-07-04	Phase II	Class I	BRAF V600E, BRAF V600K	Dabrafenib + Trametinib	Solid tumor basket trial	12	N/A	GlaxoSmithKline	NCT01928940
A Phase II Clinical Trial to Evaluate HLX208 in Advanced Melanoma Patients With BRAF V600 Mutation	Active, recruiting	2022-03-21	N/A	Phase II	Class I	BRAF V600	HLX208	Melanoma	30	N/A	Shanghai Henlius Biotech	NCT05114603
Encorafenib and Binimetinib With or Without Nivolumab in Treating Patients With Metastatic Radioiodine Refractory BRAF V600 Mutant Thyroid Cancer	Active, recruiting	2020-10-30	N/A	Phase II	Class I	BRAF V600	Binimetinib + Encorafanib, Nivolumab	Metastatic Thyroid Cancer	40	N/A	Providence Health & Services	NCT04061980
The Efficacy and Safety of HLX208 in Metastatic Colorectal Cancer (mCRC) With BRAF V600E Mutation	Active, not recruiting	2022-03-23	N/A	Phase II	Class I	BRAF V600E	HLX208	Metastatic Colorectal Cancer	25	N/A	Shanghai Henlius Biotech	NCT05127759
Biopsy- and Biology-driven Optimization of Targeted Therapy in Subjects With Advanced Melanoma	Terminated	2015-11-01	2018-08-01	Phase II	Class I	BRAF V600E, BRAF V600K	Dabrafenib + Trametinib	Melanoma	10	N/A	Prof. Dr. med. Dirk Schadendorf	NCT02410863
Combined BRAF-Targeted Therapy & Immunotherapy for MelanomaCombined BRAF-Targeted Therapy & Immunotherapy for Melanoma	Terminated	2013-01-01	2016-03-01	Phase II	Class I	BRAF V600E	Aldesleukin, Vemurafenib	Melanoma	6	N/A	Massachusetts General Hospital	NCT01754376
A Study of Vemurafenib (RO5185426) in Participants With Metastatic or Unresectable Papillary Thyroid Cancer Positive for the BRAF V600 Mutation	Completed	2011-06-01	2015-05-01	Phase II	Class I	BRAF V600	Vemurafenib	Papillary Thyroid Cancer	51	0.423	Hoffmann-La Roche	NCT01286753
A Study to Detect V-Raf Murine Sarcoma Viral Oncogene Homolog B1 (BRAF) V600 Mutation on Cell-Free Deoxyribonucleic Acid (cfDNA) From Plasma in Participants With Advanced Melanoma	Completed	2016-05-23	2019-06-27	Phase II	Class I	BRAF V600	Cobimetinib + Vemurafenib	Melanoma	40	N/A	Hoffmann-La Roche	NCT02768207
BRAF/MEK Inhibition in Relapsed/Refractory Multiple Myeloma (BIRMA)	Active, not recruiting	2016-06-01	2023-03-29	Phase II	Class I	BRAF V600E, BRAF V600K	Binimetinib + Encorafanib	Multiple Myeloma	12	N/A	University of Heidelberg Medical Center	NCT02834364
Comparison of AZD6244 in Combination With Dacarbazine Versus (vs) Dacarbazine Alone in BRAF Mutation Positive Melanoma Patients	Completed	2009-07-01	2014-11-01	Phase II	Any	BRAF	AZD6244, Dacarbazine	Melanoma	385	0.29	AstraZeneca	NCT00936221
Cetuximab and Vemurafenib Plus FOLFIRI for BRAF V600E Mutated Advanced Colorectal Cancer (IMPROVEMENT)	Unknown status	2018-10-08	N/A	Phase II	Class I	BRAF V600E	Cetuximab + Vemurafenib	Colorectal Cancer	30	N/A	Shanghai Changzheng Hospital	NCT03727763
Neoadjuvant Immunotherapy in Rare Mutations Localized NSCLC	Active, recruiting	2023-04-04	N/A	Phase II	Any	BRAF	Carboplatin + Nab paclitaxel + Pemetrexed + Toripalimab	Non-Small Cell Lung Cancer	30	N/A	Guangdong Provincial People's Hospital	NCT05800340
Onalespib, Dabrafenib, and Trametinib in Treating Patients With BRAF-Mutant Melanoma or Solid Tumors That Are Metastatic or Cannot Be Removed by Surgery	Active, not recruiting	2014-05-29	N/A	Phase II	Class I	BRAF V600E, BRAF V600K	Dabrafenib + Trametinib	Melanoma	48	N/A	GlaxoSmithKline	NCT02314143
Study to Investigate the Objective Response Rate of Dabrafenib in Combination With Trametinib in Subjects With BRAF V600 Mutation-Positive Melanoma	Completed	2014-03-18	2021-04-19	Phase II	Class I	BRAF V600	Dabrafenib + Trametinib	Melanoma	77	0.61	Novartis Pharmaceuticals	NCT02083354
Neoadjuvant Dabrafenib + Trametinib for AJCC Stage IIIB-C BRAF V600 Mutation Positive Melanoma	Active, not recruiting	2014-10-01	N/A	Phase II	Class I	BRAF V600	Dabrafenib + Trametinib	Melanoma	35	N/A	Melanoma Institute Australia	NCT01972347
BRAF Inhibitor, LGX818, Utilizing a Pulsatile Schedule in Patients With Stage IV or Unresectable Stage III Melanoma Characterized by a BRAFV600 Mutation	Completed	2013-07-01	2016-03-17	Phase II	Class I	BRAF V600	LGX818	Melanoma	7	0.57	Memorial Sloan Kettering Cancer Center	NCT01894672
A Study of GSK2118436 in BRAF Mutant Metastatic Melanoma to the Brain	Completed	2011-02-01	2012-11-01	Phase II	Class I	BRAF V600E, BRAF V600K	GSK2118436	Metastatic Melanoma	172	0.405	GlaxoSmithKline	NCT01266967
A Study of Dabrafenib in Combination With Trametinib in Chinese Patients With BRAF V600E Mutant Metastatic NSCLC	Active, not recruiting	2020-08-19	N/A	Phase II	Class II, III	BRAF V600E	Dabrafenib + Trametinib	Metastatic NSCLC	40	N/A	Novartis Pharmaceuticals	NCT04452877
Concurrent Dabrafenib + Trametinib With Sterotactic Radiation in BRAF Mutation-Positive Malignant Melanoma and Brain Metastases	Terminated	2018-02-09	2020-07-29	Phase II	Class I	BRAF V600	Dabrafenib + Trametinib	Metastatic Melanoma	6	N/A	Canadian Cancer Trials Group	NCT02974803
Study of FOLFIRI + Panitumumab Using Ultra-selection Technology of Patients With Stage IV Colorectal Cancer Refractory to Irinotecan Without Any Mutation on KRAS, PIK3Ca, BRAF and NRAS Genes Detected With Highly Sensitive Techniques	Completed	2012-10-01	2016-07-01	Phase II	None	WT BRAF	FOLFIRI + Panitumab	Metastatic Colorectal Cancer	72	0.51	Spanish Cooperative Group for the Treatment of Digestive Tumours (TTD)	NCT01704703
A Phase II Clinical Trial to Evaluate HLX208 in Advanced Non-small Cell Lung Cancer Patients With BRAF V600 Mutation	Active, recruiting	2021-11-15	N/A	Phase II	Class I	BRAF V600	HLX208	Non-Small Cell Lung Cancer	20	N/A	Shanghai Henlius Biotech	NCT05065398
Regorafenib as Single Agent in Patients With Metastatic Colorectal Cancer (mCRC) With Any RAS or BRAF Mutation Previously Treated With FOLFOXIRI Plus Bevacizumab	Terminated	2014-06-01	2016-02-01	Phase II	Any	BRAF	Regorafenib	Metastatic Colorectal Cancer	15	N/A	Spanish Cooperative Group for the Treatment of Digestive Tumours (TTD)	NCT02175654
Efficacy and Safety of HL-085 Combined With Vemurafenib in BRAF V600E Patients With Non-small Cell Lung Cancer: a Phase II Clinical Study	Not Yet Recruiting	N/A	N/A	Phase II	Class I	BRAF V600E	HL-085 + Vemurafenib	Non-Small Cell Lung Cancer	75	N/A	Shanghai Kechow Pharma, Inc.	NCT05900219
Efficacy of MEK (Trametinib) and BRAFV600E (Dabrafenib) Inhibitors With Radioactive Iodine (RAI) for the Treatment of Refractory Metastatic Differentiated Thyroid Cancer	Unknown status	2017-12-27	N/A	Phase II	Class I	BRAF V600E	Dabrafenib + Trametinib + rhTSH	Metastatic Thyroid Cancer	40	N/A	Gustave Roussy, Cancer Campus, Grand Paris	NCT03244956
The Efficacy and Safety of HLX208 in Adult Langerhans Cell Histiocytosis (LCH) and Erdheim-Chester Disease (ECD) With BRAF V600E Mutation	Active, not recruiting	2021-12-06	N/A	Phase II	Class I	BRAF V600E	HLX208	Erdheim-Chester Disease, Langerhans Cell Histiocytosis	25	N/A	Shanghai Henlius Biotech	NCT05092815
A Study Comparing 3 Study Medicines (Encorafenib, Binimetinib, Pembrolizumab) to 2 Study Medicines (Ipilimumab and Nivolumab) in Patients With Advanced Melanoma	Active, recruiting	2023-06-13	N/A	Phase II	Class I	BRAF V600E, BRAF V600K	Binimetinib + Encorafenib + Pembrolizumab, Ipilimumab + Nivolumab	Melanoma	150	N/A	Pfizer	NCT05926960
Study of Efficacy and Safety of Dabrafenib and Trametinib Combination Therapy in Japanese Patients With BRAF V600E Stage IV NSCLC	Withdrawn	N/A	N/A	Phase II	Class I	BRAF V600E	Dabrafenib + Trametinib	Metastatic NSCLC	N/A	N/A	Novartis Pharmaceuticals	NCT02672358
Study Of Zelboraf (Vemurafenib) in Patients With Locally-Advanced, Unresectable, Stage IIIc Or Metastatic Melanoma and Activating Exon 15 BRAF Mutations Other Than V600E	Terminated	2011-10-31	2015-04-30	Phase II	Any	Non-V600E	Vemurafenib	Melanoma	31	N/A	Genentech, Inc.	NCT01586195
Vemurafenib and Cobimetinib Combination in BRAF Mutated Melanoma With Brain Metastasis	Completed	2015-12-01	2019-11-06	Phase II	Class I	BRAF V600	Cobimetinib + Vemurafenib	Metastatic Melanoma	43	N/A	Center Eugene Marquis	NCT02537600
A Study of Encorafenib Plus Cetuximab Taken Together With Pembrolizumab Compared to Pembrolizumab Alone in People With Previously Untreated Metastatic Colorectal Cancer	Active, recruiting	2020-06-18	N/A	Phase II	Class I	BRAF V600E	Cetuximab + Encorafenib + Pembrolizumab, Pembrolizumab	Metastatic Colorectal Cancer	104	N/A	Pfizer	NCT05217446
Sequential Combo Immuno and Target Therapy (SECOMBIT) Study	Active, not recruiting	2016-11-14	N/A	Phase II	Class I	BRAF V600E, BRAF V600K	Ipilimumab, LGX818, MEK162, Nivolumab	Metastatic Melanoma	251	N/A	Fondazione Melanoma Onlus	NCT02631447
Study of Neo-adjuvant Use of Vemurafenib Plus Cobimetinib for BRAF Mutant Melanoma With Palpable Lymph Node Metastases	Active, not recruiting	2015-08-01	N/A	Phase II	Class I	BRAF V600	Cobimetinib + Vemurafenib	Metastatic Melanoma	24	N/A	Sunnybrook Health Sciences Centre	NCT02036086
Testing Trametinib and Dabrafenib as a Potential Targeted Treatment in Cancers With BRAF Genetic Changes (MATCH-Subprotocol H)	Active, not recruiting	2015-08-12	N/A	Phase II	Class I	BRAF V600E, BRAF V600K	Dabrafenib + Trametinib	Basket Trial	35	N/A	National Cancer Institute (NCI)	NCT04439292
Intermittent LGX818 and MEK162 in Treating Patients With Metastatic Melanoma Who Have BRAFV600 Mutations	Withdrawn	2015-01-01	N/A	Phase II	Class I	BRAF V600	Binimetinib + LGX818	Metastatic Melanoma	N/A	N/A	Jonsson Comprehensive Cancer Center	NCT02263898
Study of Efficacy and Safety of Dabrafenib in Combination With Trametinib in Pediatric Patients With BRAF V600 Mutation Positive LGG or Relapsed or Refractory HGG Tumors	Completed	2017-12-28	2023-04-28	Phase II	Class I	BRAF V600	Carboplatin + Vincristine, Dabrafenib +Trametinib	Glioma	151	0.561	Novartis Pharmaceuticals	NCT02684058
Immunotherapy With Ipilimumab and Nivolumab Preceded or Not by a Targeted Therapy With Encorafenib and Binimetinib	Active, not recruiting	2018-10-30	N/A	Phase II	Class I	BRAF V600E, BRAF V600K	Binimetinib + Encorafenib, Ipilimumab + Nivolumab	Melanoma	271	N/A	European Organisation for Research and Treatment of Cancer - EORTC	NCT03235245
Binimetinib and Encorafenib for the Treatment of Pancreatic Cancer in Patients With a Somatic BRAF V600E Mutation	Active, not recruiting	2020-11-16	N/A	Phase II	Class I	BRAF V600E	Binimetinib + Encorafenib	Pancreatic Cancer	29	N/A	Academic and Community Cancer Research United	NCT04390243
Dabrafenib, Trametinib, and Spartalizumab for the Treatment of BRAF V600E or V600K Mutation Positive Stage IIIB/C/D Melanoma	Completed	2020-01-29	2023-10-09	Phase II	Class I	BRAF V600E, BRAF V600K	Dabrafenib + Spartalizumab + Trametinib	Melanoma	4	N/A	M.D. Anderson Cancer Center	NCT04310397
Recombinant EphB4-HSA Fusion Protein and Pembrolizumab, MK-3475	Active, not recruiting	2017-03-10	N/A	Phase II	Any	BRAF	EphB4-HAS, Pembrolizumab	Metastatic NSCLC, Head and Neck Squamous Cell Cancer	42	N/A	University of Southern California	NCT03049618
Efficacy and Safety of the Combination Therapy of Dabrafenib and Trametinib in Subjects With BRAF V600E- Mutated Rare Cancers	Completed	2014-03-12	2021-12-10	Phase II	Class I	BRAF V600E	Dabrafenib + Trametinib	Rare Cancers	206	0.89	Novartis Pharmaceuticals	NCT02034110
An Open-label Study of GSK1120212 Compared With Docetaxel in Stage IV KRAS-mutant Non-small Cell Lung Cancer	Completed	2011-09-01	2013-09-01	Phase II	Any	BRAF	Docetaxel, GSK1120212	Non-Small Cell Lung Cancer	134	0.12	GlaxoSmithKline	NCT01362296
Dabrafenib and Trametinib Before and After Surgery in Treating Patients With Stage IIIB-C Melanoma With BRAF V600 Mutation	Active, not recruiting	2014-10-22	N/A	Phase II	Class I	BRAF V600E, BRAF V600K	Dabrafenib + Trametinib	Melanoma	66	N/A	M.D. Anderson Cancer Center	NCT02231775
Vemurafenib in Treating Patients With Relapsed or Refractory Advanced Solid Tumors, Non-Hodgkin Lymphoma, or Histiocytic Disorders With BRAF V600 Mutations (A Pediatric MATCH Treatment Trial)	Active, not recruiting	2017-11-08	N/A	Phase II	Class I	BRAF V600	Vemurafenib	Solid tumor basket trial	4	0.25	National Cancer Institute (NCI)	NCT03220035
An Open-label Study of Encorafenib + Binimetinib in Patients With BRAFV600-mutant Non-small Cell Lung Cancer	Active, not recruiting	2019-06-04	N/A	Phase II	Class I	BRAF V600E	Binimetinib + Encorafenib	Non-Small Cell Lung Cancer	98	0.746	Pfizer	NCT03915951
Testing the Addition of Nivolumab to Standard Treatment for Patients With Metastatic or Unresectable Colorectal Cancer That Have a BRAF Mutation	Active, recruiting	2022-07-19	N/A	Phase II	Class I	BRAF V600E	Cetuximab + Encorafenib + Nivolumab, Cetuximab + Encorafenib	Colorectal Cancer	84	N/A	National Cancer Institute (NCI)	NCT05308446
STA-9090(Ganetespib) in Patients With Unresectable Stage III or Stage IV Melanoma	Terminated	2011-09-01	2012-09-01	Phase II	Any	BRAF	STA-9090	Melanoma	3	N/A	Dana-Farber Cancer Institute	NCT01551693
Neoadjuvant Treatment of Colon Cancer	Completed	2010-04-01	2015-03-01	Phase II	Any	BRAF	Capecitabine, Oxaliplatin, Panitumumab	Colon Cancer	76	N/A	Vejle Hospital	NCT01108107
Study of Immunotherapy (Sasanlimab) in Combination With Targeted Therapies in People With Advanced Non-small Cell Lung Cancer (NSCLC) (Landscape 1011 Study)	Active, not recruiting	2020-11-10	N/A	Phase II	Class I	BRAF V600E	Axitinib + Sasanlimab + SEA-TGT, Binimetinib + Encorafenib + Sasanlimab	Non-Small Cell Lung Cancer	34	N/A	Pfizer	NCT04585815
T3011 in Combination With Cobimetinib in Patients With Advanced Melanoma	Not Yet Recruiting	N/A	N/A	Phase II	Class I	BRAF V600E, BRAF V600K	Cobimetinib + T3011	Melanoma	68	N/A	ImmVira Pharma Co. Ltd.	NCT05756556
Combination Study of RMC-4630 and Sotorasib for NSCLC Subjects With KRASG12C Mutation After Failure of Prior Standard Therapies	Active, not recruiting	2021-12-30	N/A	Phase II	Not Mentioned	Not Mentioned	RMC-4630 + Sotorasib	Non-Small Cell Lung Cancer	47	N/A	Resolution Medicines, Inc.	NCT05054725
Regorafenib, With Cetuximab or Panitumumab, for the Treatment of Unresectable, Locally Advanced, or Metastatic Colorectal Cancer	Active, recruiting	2020-03-03	N/A	Phase II	None	BRAF V600E WT	Cetuximab + Irinotecan + Panitumumab, Regorafenib	Colorectal Cancer	124	N/A	Academic and Community Cancer Research United	NCT04117945
Rechallenge of Cetuximab Combined With Irinotecan as Third-line Chemotherapy in Patients With Metastatic Colorectal Cancer - Phase II Study	Terminated	2015-09-23	2017-01-01	Phase II	Class I	BRAF V600E	Cetuximab + Irinotecan	Metastatic Colorectal Cancer	2	N/A	GERCOR - Multidisciplinary Oncology Cooperative Group	NCT02316496
Regorafenib+FOLFIRI Versus Placebo+FOLFIRI as 2nd Line Tx in Metastatic Colorectal Cancer	Completed	2011-04-07	2020-10-02	Phase II	Not Mentioned	Not Mentioned	FOLFIRI + Regorafenib	Metastatic Colorectal Cancer	181	0.343	UNC Lineberger Comprehensive Cancer Center	NCT01298570
DETERMINE Trial Treatment Arm 05: Vemurafenib in Combination With Cobimetinib in Adult Patients With BRAF Positive Cancers.	Active, recruiting	2023-03-01	N/A	Phase II & III	Class I	BRAF V600	Cobimetinib + Vemurafenib	Basket Trial	30	N/A	Cancer Research UK	NCT05768178
DETERMINE (Determining Extended Therapeutic Indications for Existing Drugs in Rare Molecularly Defined Indications Using a National Evaluation Platform Trial) - Master Screening Protocol	Active, recruiting	2023-03-01	N/A	Phase II & III	Not Mentioned	Not Mentioned	Alectinib, Atezolizumab, Entrectinib, Trastuzumab + Pertuzumab, Vemurafenib + Cobimetinib	Basket Trial	825	N/A	Cancer Research UK	NCT05722886
Dabrafenib Plus Trametinib vs Vemurafenib Alone in Unresectable or Metastatic BRAF V600E/K Cutaneous Melanoma	Completed	2012-06-04	2019-04-25	Phase III	Class I	BRAF V600E, BRAF V600K	Dabrafenib + Trametinib, Vemurafenib	Cutaneous Melanoma	704	0.68	Novartis Pharmaceutials	NCT01597908
GSK1120212 vs Chemotherapy in Advanced or Metastatic BRAF V600E/K Mutation-positive Melanoma	Completed	2010-11-22	2016-12-16	Phase III	Class I	BRAF V600E, BRAF V600K	Trametinib	Melanoma	322	0.285	GlaxoSmithKline	NCT01245062
Dabrafenib With Trametinib in the Adjuvant Treatment of High-risk BRAF V600 Mutation-positive Melanoma (COMBI-AD).	Completed	2013-01-08	2023-07-31	Phase III	Class I	BRAF V600E, BRAF V600K	Dabrafenib + Trametinib	Melanoma	870	N/A	Novartis Pharmaceutials	NCT018682083
Study in mCRC Patients RAS/BRAF wt Tissue and RAS Mutated LIquid BIopsy to Compare FOLFIRI Plus CetuxiMAb or BevacizumaB	Active, recruiting	2021-04-30	N/A	Phase III	None	WT BRAF	Bevacizumab, Cetuximab, Calcium Ievofolinate, Irinotecan, 5-FU	Metastatic Colorectal Cancer	280	N/A	Azienda Unita Sanitaria Locale Reggio Emilia	NCT04776655
A Study Comparing Vemurafenib Versus Vemurafenib Plus Cobimetinib in Participants With Metastatic Melanoma	Completed	2013-01-08	2019-07-21	Phase III	Class I	BRAF V600	Cobimetinib + Vemurafenib, Vemurafenib	Melanoma	495	0.696	Hoffmann-La Roche	NCT01689519
A Study Comparing Trametinib and Dabrafenib Combination Therapy to Dabrafenib Monotherapy in Subjects With BRAF-mutant Melanoma	Completed	2012-05-04	2019-02-28	Phase III	Any	BRAF V600E, BRAF V600K	Dabrafenib, Dabrafenib + Trametinib	Melanoma	423	0.695	Novartis Pharmaceutials	NCT01584648
Adjuvant Encorafenib and Binimetinib in High-risk Stage II Melanoma With a BRAF Mutation.	Active, recruiting	2022-05-02	N/A	Phase III	Class I	BRAF V600E, BRAF V600K	Binimetinib + Encorafanib	Melanoma	815	N/A	Pierre Fabre Medicament	NCT05270044
A Study Comparing GSK2118436 to Dacarbazine (DTIC) in Previously Untreated Subjects With BRAF Mutation Positive Advanced (Stage III) or Metastatic (Stage IV) Melanoma	Completed	2010-12-23	2016-09-16	Phase III	Class I	BRAF V600E	Dacarbazine, GSK2118436	Melanoma	251	0.599	GlaxoSmithKline	NCT01227889
A Clinical Trial of Three Study Medicines (Encorafenib, Binimetinib, and Pembrolizumab) in Patients With Advanced or Metastatic Melanoma	Active, recruiting	2018-04-20	N/A	Phase III	Class I	BRAF V600E, BRAF V600K	Bimetinib + Encorafenib + Pembrolizumab	Melanoma	624	N/A	Pfizer	NCT04657991
Study of Dabrafenib+Trametinib in the Adjuvant Treatment of Stage III BRAF V600+ Melanoma After Complete Resection to Evaluate the Impact on Pyrexia Related Outcomes	Completed	2018-08-29	2021-09-16	Phase III	Class I	BRAF V600E, BRAF V600K	Dabrafenib + Trametinib	Melanoma	556	N/A	Novartis Pharmaceuticals	NCT03551626
A Study of Vemurafenib (RO5185426) in Comparison With Dacarbazine in Previously Untreated Patients With Metastatic Melanoma (BRIM 3)	Completed	2010-01-01	2015-07-01	Phase III	Class I	BRAF V600E	Dacarbazine, Vemurafenib	Metastatic Melanoma	675	0.484	Hoffmann-La Roche	NCT01006980
Clinical Study To Further Evaluate The Efficacy Of Dabrafenib Plus Trametinib In Patients With Rare BRAF V600E Mutation-Positive Unresectable or Metastatic Solid Tumors	Not Yet Recruiting	N/A	N/A	Phase IV	Class I	BRAF V600E	Dabrafenib, Trametinib	Basket Trial	40	N/A	Novartis Pharmaceutials	NCT05868629
An Extension (Rollover) Study of Vemurafenib in Participants With BRAF V600 Mutation-Positive Malignancies Previously Enrolled in an Antecedent Vemurafenib Protocol	Completed	2013-02-19	2020-02-17	Phase IV	Class I	BRAF V600	Vemurafenib	Basket Trial	215	N/A	Hoffmann-La Roche	NCT01739764
HD IL-2 + Vemurafenib in Patients With BRAF Mutation Positive Metastatic Melanoma	Terminated	2012-08-01	2014-11-01	Phase IV	Class I	BRAF V600	HD IL-2 + Vemurafenib	Metastatic Melanoma	53	N/A	Clinigen, Inc.	NCT01683188
Dabrafenib and/or Trametinib Rollover Study	Active, recruiting	2017-12-28	N/A	Phase IV	Any	BRAF	Dabrafenib + Trametinib, Dabrafenib, Trametinib	Basket Trial	100	N/A	Novartis Pharmaceuticals	NCT03340506
An Open-Label Study of Zelboraf (Vemurafenib) in Patients With Braf V600 Mutation Positive Metastatic Melanoma	Completed	2013-10-17	2019-05-22	Phase IV	Class I	BRAF V600	Zelboraf	Metastatic Melanoma	60	N/A	Hoffmann-La Roche	NCT01898585

## Sheet: Phase I
Name of Trial	Status	Study Start	Study End	Phase	Class of BRAF	Mutation/fusion	Treatment	Cancer Type(s)	Number of Patients Enrolled	Highest ORR (overall response rate)	Sponsor	NCT number
A Study of LGK974 in Patients With Malignancies Dependent on Wnt Ligands	Active (not recruiting)	2011-12-01	N/A	Phase I	Any	BRAF	LGK974 + PDR001, LGK974	Solid tumor basket trial	185	N/A	Novartis Pharmaceuticals	NCT01351103
Study of EGF816 in Combination With Selected Targeted Agents in EGFR-mutant NSCLC	Active (not recruiting)	2018-01-29	N/A	Phase I	Not Mentioned	Not Mentioned	non-BRAF study, N/A	Non-Small Cell Lung Cancer	105	N/A	Novartis Pharmaceuticals	NCT03333343
Vemurafenib Plus Copanlisib in Radioiodine-Refractory (RAIR) Thyroid Cancers	Active (not recruiting)	2020-06-26	N/A	Phase I	Class I	BRAF V600	Copanlisib + Vemurafenib	Thyroid Cancer	8	N/A	Memorial Sloan Kettering Cancer Center	NCT04462471
XL888 + Vemurafenib + Cobimetinib for Unresectable BRAF Mutated Stage III/IV Melanoma	Active (not recruiting)	2016-09-07	N/A	Phase I	Class I	BRAF V600	Cobimetinib + Vemurafenib + XL888	Melanoma	26	N/A	H. Lee Moffitt Cancer Center and Research Institute	NCT02721459
A PhaseI Study of HL-085 Plus Vemurafenib in Solid Tumor With BRAF V600 Mutation	Active (recruiting)	2018-07-01	N/A	Phase I	Class I	BRAF V600	HL-085 + Vemurafenib	Solid tumor basket trial	45	N/A	Shanghai Kechow Pharma, Inc.	NCT03781219
A Study of ABM-1310 in Patients With BRAF V600-Mutant Advanced Solid Tumors	Active (recruiting)	2022-09-01	N/A	Phase I	Class I	BRAF V600	ABM-1310	Basket Trial	72	N/A	ABM Therapeutics Shanghai Company Limited, Shanghai East Hospital	NCT05501912
A Study of BDTX-4933 in Patients With BRAF and Select RAS/MAPK Mutation-Positive Cancers	Active (recruiting)	2023-04-18	N/A	Phase I	Any	BRAF	BDTX-4933	Basket Trial	140	N/A	Black Diamond Therapeutics, Inc.	NCT05786924
A Study to Evaluate KIN-2787 in Participants With BRAF and/or NRAS Mutation Positive Solid Tumors	Active (recruiting)	2021-08-04	N/A	Phase I	Any	BRAF	KIN-2787, KIN-2787 + Binimetinib	Solid tumor basket trial	400	N/A	Kinnate Biopharma	NCT04913285
Adjuvant Therapy Based on Pathologic Response After Neoadjuvant Encorafenib Binimetinib in Melanoma	Active (recruiting)	2021-05-24	N/A	Phase I	Class I	BRAF V600	Binimetinib + Encorafanib, Nivolumab	Melanoma	50	N/A	H. Lee Moffitt Cancer Center and Research Institute	NCT04741997
Dabrafenib, Trametinib, and IMRT in Treating Patients With BRAF Mutated Anaplastic Thyroid Cancer	Active (recruiting)	2020-09-14	N/A	Phase I	Class I	BRAF V600E, BRAF V600K	Dabrafenib, Trametinib, IMRT	Thyroid Anaplastic Carcinoma	6	N/A	City of Hope Medical Center	NCT03975231
Nilotinib Plus Dabrafenib/Trametinib in Metastatic Melanoma	Active (recruiting)	2022-06-01	N/A	Phase I	Class I	BRAF V600	Nilotinib, Dabrafenib, Trametinib	Metastatic Melanoma	15	N/A	Jill M Kolesar	NCT04903119
PF-07284892 in Participants With Advanced Solid Tumors	Active (recruiting)	2021-03-17	N/A	Phase I	Class I, III	BRAF V600E, BRAF	PF-07284892, PF-07284892 + Binimetinib, Cetuximab, Encorafenib, Lorlatinib	Solid tumor basket trial	196	N/A	Pfizer	NCT04800822
Safety and Tolerability of ABM-1310 in Patients With Advanced Solid Tumors	Active (recruiting)	2020-06-16	N/A	Phase I	Any	BRAF	ABM-1310, Cobimetinib	Basket Trial	112	N/A	ABM Therapeutics Corporation, M.D. Anderson Cancer Center	NCT04190628
Study of Safety, Pharmacokinetics, and Antitumor Activity of BGB-3245 in Participants With Advanced or Refractory Tumors	Active (recruiting)	2020-02-17	N/A	Phase I	Any	BRAF	BGB-3245	Solid tumor basket trial	114	N/A	MapKure, LLC	NCT04249843
Tolerability and Safety of Vemurafenib, Cetuximab Combined With Camrelizumab for BRAF V600E-mutated /MSS Metastatic Colorectal Cancer	Active (recruiting)	2021-08-15	N/A	Phase I	Class I	BRAF V600E	Camrelizumab + Cetuximab + Vemurafenib	Metastatic Colorectal Cancer	12	N/A	West China Hospital	NCT05019534
A Pharmacokinetics (PK) Study of the Effects Rabeprazole and Rifampin on Dabrafenib in Subjects With BRAF V600 Mutation Positive Tumors	Completed	2013-12-20	2016-02-29	Phase I	Class I	BRAF V600	Dabrafenib, Dabrafenib + Rabeprazole, Dabrafenib + Rifampin	Basket Trial	23	N/A	GlaxoSmithKline	NCT01954043
A Phase 1b Study of Atezolizumab in Combination With Vemurafenib or Vemurafenib Plus Cobimetinib in Participants With BRAFV600-Mutation Positive Metastatic Melanoma	Completed	2012-08-13	2020-03-25	Phase I	Class I	BRAF V600	Atezolizumab + Cobimetinib + Vemurafenib, Atezolizumab + Vemurafenib	Metastatic Melanoma	67	0.718	Genentech, Inc.	NCT01656642
A Phase I Study of Oral LGX818 in Adult Patients With Advanced or Metastatic BRAF Mutant Melanoma	Completed	2011-09-05	2022-11-07	Phase I	Class I	BRAF V600	LGX818	Melanoma	93	N/A	Pfizer	NCT01436656
A Phase I Study to Investigate the Safety, Tolerability and Pharmacokinetic Profile of of GSK2118436 in Japanese Subjects With BRAF Mutation Positive Solid Tumors	Completed	2012-05-11	2015-04-16	Phase I	Class I	BRAF V600E, BRAF V600K	GSK2118436	Solid tumor basket trial	12	0.58	GlaxoSmithKline	NCT01582997
A Phase Ib Study of MEK162 Plus BYL719 in Adult Patients With Selected Advanced Solid Tumors	Completed	2012-03-01	2017-08-15	Phase I	Not Mentioned	Not Mentioned	BYL719 + MEK162	Solid tumor basket trial	139	N/A	Array BioPharma	NCT01449058
A Rollover Study to Provide Continued Treatment With GSK2118436 to Subjects With BRAF Mutation-Positive Tumors	Completed	2010-11-05	2018-04-09	Phase I	Any	BRAF	GSK2118436, GSK1120212	Basket Trial	214	N/A	Novartis Pharmaceutials	NCT01231594
A Study of the Effect of Food on the Pharmacokinetics of Single Dose RO5185426 And the Safety And Efficacy of Continuous Administration in Patients With BRAF V600E Mutation-Positive Metastatic Melanoma	Completed	2011-01-01	2013-05-01	Phase I	Class I	BRAF V600E	RO5185426	Metastatic Melanoma	16	0.643	Hoffmann-La Roche	NCT01264380
A Study of The Impact of Severe Hepatic Impairment on the Pharmacokinetics and Safety of Vemurafenib in BRAF V600 Mutation-Positive Cancer Participants	Completed	2013-08-20	2017-04-20	Phase I	Class I	BRAF V600	Vemurafenib	Solid tumor basket trial	8	N/A	Hoffmann-La Roche	NCT01767623
A Study of Vemurafenib (Zelboraf) in Chinese Participants With BRAF V600 Mutation-Positive Unresectable or Metastatic Melanoma	Completed	2013-08-17	2018-04-20	Phase I	Class I	BRAF V600	Vemurafenib	Melanoma	46	0.522	Hoffmann-La Roche	NCT01910181
A Study of Vemurafenib and GDC-0973 (Cobimetinib) in Participants With BRAFV600E Mutation-Positive Metastatic Melanoma	Completed	2011-02-17	2013-10-01	Phase I	Class I	BRAF V600E	Cobimetinib + Vemurafenib, Cobimetinub	Metastatic Melanoma	131	0.873	Hoffmann-La Roche	NCT01271803
A Study to Evaluate the Effect of Repeat Oral Dosing of GSK2118436 on Cardiac Repolarization in Subjects With V600 BRAF Mutation-Positive Tumors	Completed	2013-01-22	2014-11-28	Phase I	Class I	BRAF V600	GSK2118436	Basket Trial	50	N/A	GlaxoSmithKline	NCT01738451
A Study to Investigate the Effect of Itraconazole and Rifampin on Pharmacokinetics (PK) of Vemurafenib at Steady State	Completed	2016-05-26	2018-09-10	Phase I	Class I	BRAF V600	Itraconazole, Rifampin, Vemurafenib	Metastatic Melanoma	32	N/A	Genetech, Inc.	NCT02608034
An Open Label Study to Examine the Effects of a High-Fat Meal and Particle Size on the Pharmacokinetics of Orally Administered GSK2118436 in Subjects With BRAF Mutation Positive Tumor	Completed	2010-10-21	2011-05-13	Phase I	Any	BRAF	GSK2118436	Basket Trial	28	N/A	GlaxoSmithKline	NCT01231568
Bioavailability Study of Vemurafenib in Participants With BRAF^V600 Mutation-Positive Malignancies	Completed	2015-08-13	2017-01-09	Phase I	Class I	BRAF V600	Vemurafenib	Melanoma	6	N/A	Hoffmann-La Roche	NCT02441465
Bioequivalence Binimetinib 3 x 15 mg and 45 mg Formulations	Completed	2022-08-31	2023-01-18	Phase I	Class I	BRAF V600	Binimetinib	Melanoma	37	N/A	Pierre Fabre Medicament	NCT05810740
Continued Access to RXDX-105	Completed	2018-12-14	2020-09-30	Phase I	Class I	BRAF V600E	RXDX-105	Colorectal Cancer	3	N/A	Memorial Sloan Kettering Cancer Center	NCT03784378
Determination of the Absolute Bioavailability of GSK2118436 Following a Single Oral Dose Co-Administered With an Intravenous Radiolabelled Microtracer of GSK2118436 in Subjects With BRAF Mutant Solid Tumors	Completed	2011-06-08	2011-09-12	Phase I	Any	BRAF	GSK2118436	Solid tumor basket trial	6	N/A	GlaxoSmithKline	NCT01340833
Dose Escalation Study of ARQ 736 in Adult Subjects With Advanced Solid Tumors Harboring BRAF and/or NRAS Mutations	Completed	2010-10-01	2013-03-01	Phase I	Any	BRAF	ARQ736	Solid tumor basket trial	24	N/A	ArQule, Inc.	NCT01225536
Effects of Dabrafenib on the Single Dose Pharmacokinetics (PK) of Rosuvastatin and Midazolam	Completed	2015-02-19	2016-08-01	Phase I	Class I	BRAF V600	Dabrafenib + Midazolam + Rosuvastatin	Basket Trial	6	N/A	GlaxoSmithKline	NCT02082665
Expansion Study to Evaluate the Efficacy and Safety of HM95573 in BRAF, KRAS or NRAS Mutant Solid Cancers	Completed	2017-05-19	2020-02-04	Phase I	Any	BRAF	HM95573	Solid tumor basket trial	65	N/A	Hanmi Pharmaceutical Company Limited	NCT03118817
Phase 1 Safety and Tolerability of MEDI4736 in Combination With Dabrafenib and Trametinib or With Trametinib Alone	Completed	2013-12-20	2018-04-24	Phase I	Class I	BRAF V600E, BRAF V600K	Dabrafenib + Durvalumab + Trametinib, Durvalumab + Trametinib	Melanoma	68	0.692	MedImmune LLC	NCT02027961
Phase 1 Safety Study of Encorafenib in Chinese Patients With Advanced Metastatic BRAF V600E Mutant Solid Tumors	Completed	2021-09-27	2022-05-06	Phase I	Class I	BRAF V600E	Encorefanib	Metastatic Melanoma, Metastatic NSCLC	3	N/A	Pierre Fabre Medicament	NCT05003622
Study of Dabrafenib +/- Trametinib in Combination With Ipilimumab for V600E/K Mutation Positive Metastatic or Unresectable Melanoma	Completed	2013-02-12	2015-09-04	Phase I	Class I	BRAF V600E, BRAF V600K	Dabrafenib + Ipilimumab +Trametinib, Dabrafenib + Ipilimumab	Melanoma	38	0.64	GlaxoSmithKline	NCT01767454
Study of RXDX-105, Potent RET Inhibitor in Patients With Advanced Lung Cancer and Other Solid Tumors	Completed	2013-06-01	2019-02-01	Phase I	Any	BRAF	RXDX-105	Solid tumor basket trial	143	N/A	Hoffmann-La Roche	NCT01877811
Study of Vemurafenib, Carboplatin, and Paclitaxel	Completed	2012-07-09	2020-04-21	Phase I	Any	BRAF	Carboplatin + Paclitaxel + Vemurafenib	Lymphoma, Solid Tumors	21	N/A	M.D. Anderson Cancer Center	NCT01636622
Vemurafenib and Panitumumab Combination Therapy in Patients With BRAF V600E Mutated Metastatic Colorectal Cancer	Completed	2013-01-01	2015-03-01	Phase I	Class I	BRAF V600E	Panitumumab + Vemurafenib	Metastatic Colorectal Cancer	16	N/A	Memorial Sloan Kettering Cancer Center	NCT01791309
Vemurafenib in Combination With Everolimus or Temsirolimus With Advanced Cancer	Completed	2012-12-18	2020-06-01	Phase I	Any	BRAF	Everolimus, Temsirolimus, Vemurafenib	Solid tumor basket trial	27	N/A	M.D. Anderson Cancer Center	NCT01596140
Vemurafenib With Sorafenib Tosylate or Crizotinib in Treating Patients With Advanced Malignancies With BRAF Mutations	Completed	2012-02-06	2021-01-13	Phase I	Any	BRAF	Crizotinib, Sorafenib, Vemurafenib	Basket Trial	46	N/A	M.D. Anderson Cancer Center	NCT01531361
Combining Talimogene Laherparepvec With BRAF and MEK Inhibitors in BRAF Mutated Advanced Melanoma	Unknown status	2017-06-25	N/A	Phase I	Any	BRAF	Talimogene laherparepvec, dabrafenib, trametinib	Melanoma	4	N/A	West Cancer Center	NCT03088176
BRAF V600E Mutations In Papillary Thyroid Carcinoma	Unknown status	2011-07-01	N/A	Phase I	Class I	BRAF V600E	N/A (observational)	Papillary Thyroid Carcinoma	150	N/A	Bezmialem Vakif University	NCT01417442
Relative Bioavailability of Binimetinib 3 x 15 mg and 45 mg Formulations	Unknown status	2021-09-03	N/A	Phase I	Class I	BRAF V600	Binimetinib	Melanoma	14	N/A	Pierre Fabre Medicament	NCT05103891

## Sheet: Phase I & II
Name of Trial	Status	Study Start	Study End	Phase	Class of BRAF	Mutation/fusion	Treatment	Cancer Type(s)	Number of Patients Enrolled	Highest ORR (overall response rate)	Sponsor	NCT number
XP-102 and XP-102 in Combination With Trametinib in Advanced Solid Tumor Patients With a BRAF V600 Mutation	Not Yet Recruiting	N/A	N/A	Phase I & II	Class I	BRAF V600	Trametinib, XP-102	Solid tumor basket trial	221	N/A	Xynomic Pharmaceuticals, Inc.	NCT053275374
Safety and Efficacy in Participants With Metastatic BRAF-mutant Melanoma Treated With Encorafenib With and Without Binimetinib in Combination With Nivolumab and Low-dose Ipilimuma	Active (not recruiting)	2021-05-28	N/A	Phase I & II	Class I	BRAF V600E, BRAF V600K	Binimetinib + Encorafenib + Ipilimumab + Nivolumab, Encorafenib + Ipilimumab + Nivolumab	Melanoma	2	N/A	Jason J. Luke, MD	NCT04655157
The Efficacy and Safety of HLX208 in Advanced Anaplastic Thyroid Cancer (ATC) With BRAF V600 Mutation	Active (not recruiting)	2021-12-10	N/A	Phase I & II	Class I	BRAF V600	HLX208	Anaplastic Thyroid Cancer	25	N/A	Shanghai Henlius Biotech	NCT05102292
A Phase 1/2 Study of DCC-3116 in Patients With MAPK Pathway Mutant Solid Tumors	Active (recruiting)	2021-06-15	N/A	Phase I & II	Any	RAF	DCC-3116 + Binimetinib, DCC-3116 + Sotorasib, DCC-3116 + Trametinib, DCC-3116	Solid tumor basket trial	323	N/A	Deciphera Pharmaceuticals LLC	NCT04892017
A Phase Ib/II Clinical Trial to Evaluate the Safety and Efficacy of HLX208+HLX10 in NSCLC With BRAF V600E Mutation	Active (recruiting)	2023-02-28	N/A	Phase I & II	Class I	BRAF V600	HLX208 + HLX10	Non-Small Cell Lung Cancer	49	N/A	Shanghai Henlius Biotech	NCT05641493
A Study of ERAS-007 in Patients With Advanced Gastrointestinal Malignancies	Active (recruiting)	2021-09-20	N/A	Phase I & II	Class I	BRAF V600E	Cetuximab + Encorafenib + ERAS-007	Metastatic Colorectal Cancer	200	N/A	Erasca, Inc.	NCT05039177
Tovorafenib (DAY101) Monotherapy or in Combination With Other Therapies for Patients With Melanoma and Other Solid Tumors	Active (recruiting)	2021-07-15	N/A	Phase I & II	Any	BRAF fusion	Pimasertib, Tovorafenib	Solid tumor basket trial	168	N/A	Day One Biopharmaceuticals, Inc.	NCT04985604
A Phase Ib/II Study of LGX818 in Combination With MEK162 in Adult Patients with BRAF Dependent Advanced Solid Tumors	Completed	2012-05-28	2023-03-09	Phase I & II	Class I	BRAF V600	LGX818, MEK162, LEE011	Solid tumor basket trial	189	0.67	Pfizer	NCT01543698
A Study to Determine Safety, Tolerability and Pharmacokinetics of Oral Dabrafenib In Children and Adolescent Subjects	Completed	2013-05-23	2020-12-04	Phase I & II	Class I	BRAF V600	Dabrafenib	Brain Tumor	85	0.833	Novartis Pharmaceuticals	NCT01677741
BRAF/MEK/EGFR Inhibitor Combination Study in Colorectal Cancer (CRC)	Completed	2012-12-19	2020-06-18	Phase I & II	Class I	BRAF V600E	Dabrafenib, Panitumumab, Trametinib, 5-fluorouracil	Colorectal Cancer	166	0.67	Novartis Pharmaceutials	NCT01750918
Dose-Esc/Exp RMC4630 & Cobi in Relapsed/Refractory Solid Tumors & RMC4630& Osi in EGFR+ Locally Adv/Meta NSCLC	Completed	2019-07-02	2022-02-08	Phase I & II	Class III	BRAF	Cobimetinib + RMC-4630	Basket Trial	113	0.0182	Resolution Medicines, Inc.	NCT03989115
Radiotherapy & Combi in Metastatic Melanoma	Completed	2015-05-01	2020-04-17	Phase I & II	Class I	BRAF V600E, BRAF V600K	Dabrafenib + Trametinib	Metastatic Melanoma	10	N/A	Melanoma and Skin Cancer Trials Limited	NCT02392871
Study of WNT974 in Combination With LGX818 and Cetuximab in Patients With BRAF-mutant Metastatic Colorectal Cancer (mCRC) and Wnt Pathway Mutations	Completed	2014-12-01	2017-06-23	Phase I & II	Class I	BRAF V600	Cetuximab + LGX818 + WNT974	Metastatic Colorectal Cancer	20	N/A	Array BioPharma	NCT02278133
HDAC Inhibitor Vorinostat in Resistant BRAF V600 Mutated Advanced Melanoma	Unknown status	2016-06-01	N/A	Phase I & II	Class I	BRAF V600	Vorinostat	Melanoma	22	N/A	The Netherlands Cancer Institute	NCT02836548

## Sheet: Phase II
Name of Trial	Status	Study Start	Study End	Phase	Class of BRAF	Mutation/fusion	Treatment	Cancer Type(s)	Number of Patients Enrolled	Highest ORR (overall response rate)	Sponsor	NCT number
A Phase II Clinical Trial to Evaluate HLX208 in Advanced Solid Tumor Patients With BRAF V600 Mutation	Not Yet Recruiting	N/A	N/A	Phase II	Class I	BRAF V600	HLX208	Solid tumor basket trial	30	N/A	Shanghai Henlius Biotech	NCT05528406
Dabrafenib Plus Trametinib in Patients With Advanced Solid Tumor Having BRAF V600E Mutation or Clinically Actionable BRAF Gene Alterations	Not Yet Recruiting	N/A	N/A	Phase II	Any	BRAF	Dabrafenib, Trametinib	Basket Trial	30	N/A	Seoul St. Mary's Hospital, The Catholic University of Korea	NCT05876806
Efficacy and Safety of HL-085 Combined With Vemurafenib in BRAF V600E Patients With Non-small Cell Lung Cancer: a Phase II Clinical Study	Not Yet Recruiting	N/A	N/A	Phase II	Class I	BRAF V600E	HL-085 + Vemurafenib	Non-Small Cell Lung Cancer	75	N/A	Shanghai Kechow Pharma, Inc.	NCT05900219
Neoadjuvant and Adjuvant Targeted Treatment in NSCLC With BRAF V600 or MET Exon 14 Mutations	Not Yet Recruiting	N/A	N/A	Phase II	Class I	BRAF V600	Dabrafenib + Trametinib, Capmatinib	Non-Small Cell Lung Cancer	40	N/A	Sun Yat-sen University	NCT06054191
T3011 in Combination With Cobimetinib in Patients With Advanced Melanoma	Not Yet Recruiting	N/A	N/A	Phase II	Class I	BRAF V600E, BRAF V600K	Cobimetinib + T3011	Melanoma	68	N/A	ImmVira Pharma Co. Ltd.	NCT05756556
A Study of Dabrafenib in Combination With Trametinib in Chinese Patients With BRAF V600E Mutant Metastatic NSCLC	Active (not recruiting)	2020-08-19	N/A	Phase II	Class II, III	BRAF V600E	Dabrafenib + Trametinib	Metastatic NSCLC	40	N/A	Novartis Pharmaceuticals	NCT04452877
An Open-label Study of Encorafenib + Binimetinib in Patients With BRAFV600-mutant Non-small Cell Lung Cancer	Active (not recruiting)	2019-06-04	N/A	Phase II	Class I	BRAF V600E	Binimetinib + Encorafenib	Non-Small Cell Lung Cancer	98	0.746	Pfizer	NCT03915951
Binimetinib and Encorafenib for the Treatment of Advanced Solid Tumors With Non-V600E BRAF Mutations	Active (not recruiting)	2019-06-07	N/A	Phase II	Class II, III	Non-V600E	Binimetinib + Encorafanib	Solid tumor basket trial	26	N/A	University Health Networrk, Toronto	NCT3839342
Binimetinib and Encorafenib for the Treatment of Pancreatic Cancer in Patients With a Somatic BRAF V600E Mutation	Active (not recruiting)	2020-11-16	N/A	Phase II	Class I	BRAF V600E	Binimetinib + Encorafenib	Pancreatic Cancer	29	N/A	Academic and Community Cancer Research United	NCT04390243
BRAF/MEK Inhibition in Relapsed/Refractory Multiple Myeloma (BIRMA)	Active (not recruiting)	2016-06-01	2023-03-29	Phase II	Class I	BRAF V600E, BRAF V600K	Binimetinib + Encorafanib	Multiple Myeloma	12	N/A	University of Heidelberg Medical Center	NCT02834364
Combination Study of RMC-4630 and Sotorasib for NSCLC Subjects With KRASG12C Mutation After Failure of Prior Standard Therapies	Active (not recruiting)	2021-12-30	N/A	Phase II	Not Mentioned	Not Mentioned	RMC-4630 + Sotorasib	Non-Small Cell Lung Cancer	47	N/A	Resolution Medicines, Inc.	NCT05054725
Dabrafenib and Trametinib Before and After Surgery in Treating Patients With Stage IIIB-C Melanoma With BRAF V600 Mutation	Active (not recruiting)	2014-10-22	N/A	Phase II	Class I	BRAF V600E, BRAF V600K	Dabrafenib + Trametinib	Melanoma	66	N/A	M.D. Anderson Cancer Center	NCT02231775
Immunotherapy With Ipilimumab and Nivolumab Preceded or Not by a Targeted Therapy With Encorafenib and Binimetinib	Active (not recruiting)	2018-10-30	N/A	Phase II	Class I	BRAF V600E, BRAF V600K	Binimetinib + Encorafenib, Ipilimumab + Nivolumab	Melanoma	271	N/A	European Organisation for Research and Treatment of Cancer - EORTC	NCT03235245
Neoadjuvant Dabrafenib + Trametinib for AJCC Stage IIIB-C BRAF V600 Mutation Positive Melanoma	Active (not recruiting)	2014-10-01	N/A	Phase II	Class I	BRAF V600	Dabrafenib + Trametinib	Melanoma	35	N/A	Melanoma Institute Australia	NCT01972347
Onalespib, Dabrafenib, and Trametinib in Treating Patients With BRAF-Mutant Melanoma or Solid Tumors That Are Metastatic or Cannot Be Removed by Surgery	Active (not recruiting)	2014-05-29	N/A	Phase II	Class I	BRAF V600E, BRAF V600K	Dabrafenib + Trametinib	Melanoma	48	N/A	GlaxoSmithKline	NCT02314143
Recombinant EphB4-HSA Fusion Protein and Pembrolizumab, MK-3475	Active (not recruiting)	2017-03-10	N/A	Phase II	Any	BRAF	EphB4-HAS, Pembrolizumab	Metastatic NSCLC, Head and Neck Squamous Cell Cancer	42	N/A	University of Southern California	NCT03049618
Sequential Combo Immuno and Target Therapy (SECOMBIT) Study	Active (not recruiting)	2016-11-14	N/A	Phase II	Class I	BRAF V600E, BRAF V600K	Ipilimumab, LGX818, MEK162, Nivolumab	Metastatic Melanoma	251	N/A	Fondazione Melanoma Onlus	NCT02631447
Study of Immunotherapy (Sasanlimab) in Combination With Targeted Therapies in People With Advanced Non-small Cell Lung Cancer (NSCLC) (Landscape 1011 Study)	Active (not recruiting)	2020-11-10	N/A	Phase II	Class I	BRAF V600E	Axitinib + Sasanlimab + SEA-TGT, Binimetinib + Encorafenib + Sasanlimab	Non-Small Cell Lung Cancer	34	N/A	Pfizer	NCT04585815
Study of Neo-adjuvant Use of Vemurafenib Plus Cobimetinib for BRAF Mutant Melanoma With Palpable Lymph Node Metastases	Active (not recruiting)	2015-08-01	N/A	Phase II	Class I	BRAF V600	Cobimetinib + Vemurafenib	Metastatic Melanoma	24	N/A	Sunnybrook Health Sciences Centre	NCT02036086
Study of Ulixertinib for Patients With Advanced Malignancies Harboring MEK or Atypical BRAF Alterations	Active (not recruiting)	2017-06-25	N/A	Phase II	Class II, III	Non-V600	Ulixertinib (BVD-523)	Basket Trial	101	N/A	Biomed Valley Discoveries, Inc	NCT04488003
Testing Trametinib and Dabrafenib as a Potential Targeted Treatment in Cancers With BRAF Genetic Changes (MATCH-Subprotocol H)	Active (not recruiting)	2015-08-12	N/A	Phase II	Class I	BRAF V600E, BRAF V600K	Dabrafenib + Trametinib	Basket Trial	35	N/A	National Cancer Institute (NCI)	NCT04439292
Testing Trametinib as a Potential Targeted Treatment in Cancers With BRAF Genetic Changes (MATCH-Subprotocol R)	Active (not recruiting)	2015-08-12	N/A	Phase II	Class II, III	Non-V600 BRAF	Trametinib	Basket Trial	35	N/A	National Cancer Institute (NCI)	NCT04439279
The Efficacy and Safety of HLX208 in Adult Langerhans Cell Histiocytosis (LCH) and Erdheim-Chester Disease (ECD) With BRAF V600E Mutation	Active (not recruiting)	2021-12-06	N/A	Phase II	Class I	BRAF V600E	HLX208	Erdheim-Chester Disease, Langerhans Cell Histiocytosis	25	N/A	Shanghai Henlius Biotech	NCT05092815
The Efficacy and Safety of HLX208 in Metastatic Colorectal Cancer (mCRC) With BRAF V600E Mutation	Active (not recruiting)	2022-03-23	N/A	Phase II	Class I	BRAF V600E	HLX208	Metastatic Colorectal Cancer	25	N/A	Shanghai Henlius Biotech	NCT05127759
The Efficacy of HLX208 (BRAF V600E Inhibitor) With Cetuximab for Metastatic Colorectal Cancer (mCRC) With BRAF V600E Mutation After First-line Treatment	Active (not recruiting)	2021-08-11	N/A	Phase II	Class I	BRAF V600E	HLX208 + Cetuximab	Colorectal Cancer	50	N/A	Shanghai Henlius Biotech	NCT04984369
To Evaluate the Efficacy Beyond Progression of Vemurafenib+Cobimetinib Associated With Local Treatment Compared to Second-line Treatment in Patients With BRAFV600+ Metastatic Melanoma in Focal Progression With First-line+Vemurafenib+Cobimetinib.	Active (not recruiting)	2018-06-18	N/A	Phase II	Class I	BRAF V600	Nivolumab, Pembrolizumab	Metastatic Melanoma	120	N/A	Intergruppo Melanoma Italiano	NCT03514901
Vemurafenib in Treating Patients With Relapsed or Refractory Advanced Solid Tumors, Non-Hodgkin Lymphoma, or Histiocytic Disorders With BRAF V600 Mutations (A Pediatric MATCH Treatment Trial)	Active (not recruiting)	2017-11-08	N/A	Phase II	Class I	BRAF V600	Vemurafenib	Solid tumor basket trial	4	0.25	National Cancer Institute (NCI)	NCT03220035
A Basket Trial of an ERK1/2 Inhibitor (LY3214996) in Combination With Abemaciclib	Active (recruiting)	2020-10-05	N/A	Phase II	Any	BRAF	Abemaciclib, LY3214996	Basket Trial	35	N/A	Indiana University, Eli Lilly and Company	NCT04534283
A Combination of Vemurafenib, Cytarabine and 2-chlorodeoxyadenosine in Children With LCH and BRAF V600E Mutation	Active (recruiting)	2018-06-26	N/A	Phase II	Class I	BRAF V600E	Cytarabine + Vemurafenib + 2-chlorodeoxyadenosine	Langerhans Cell Histiocytosis	12	N/A	Federal Research Institute of Pediatrtic Hematology, Oncology and Immunology	NCT03585686
A Phase II Clinical Trial to Evaluate HLX208 in Advanced Melanoma Patients With BRAF V600 Mutation	Active (recruiting)	2022-03-21	N/A	Phase II	Class I	BRAF V600	HLX208	Melanoma	30	N/A	Shanghai Henlius Biotech	NCT05114603
A Phase II Clinical Trial to Evaluate HLX208 in Advanced Non-small Cell Lung Cancer Patients With BRAF V600 Mutation	Active (recruiting)	2021-11-15	N/A	Phase II	Class I	BRAF V600	HLX208	Non-Small Cell Lung Cancer	20	N/A	Shanghai Henlius Biotech	NCT05065398
A Study Comparing 3 Study Medicines (Encorafenib, Binimetinib, Pembrolizumab) to 2 Study Medicines (Ipilimumab and Nivolumab) in Patients With Advanced Melanoma	Active (recruiting)	2023-06-13	N/A	Phase II	Class I	BRAF V600E, BRAF V600K	Binimetinib + Encorafenib + Pembrolizumab, Ipilimumab + Nivolumab	Melanoma	150	N/A	Pfizer	NCT05926960
A Study of Avutometinib (VS-6766) + Defactinib in Recurrent KRAS G12V, Other KRAS and BRAF Non-Small Cell Lung Cancer	Active (recruiting)	2020-12-31	N/A	Phase II	Any	BRAF	Avutometinib, Avutometinib + Defactinib	Non-Small Cell Lung Cancer	100	N/A	Verastem, Inc.	NCT04620330
A Study of Encorafenib Plus Cetuximab Taken Together With Pembrolizumab Compared to Pembrolizumab Alone in People With Previously Untreated Metastatic Colorectal Cancer	Active (recruiting)	2020-06-18	N/A	Phase II	Class I	BRAF V600E	Cetuximab + Encorafenib + Pembrolizumab, Pembrolizumab	Metastatic Colorectal Cancer	104	N/A	Pfizer	NCT05217446
Binimetinib Encorafenib Pembrolizumab +/- Stereotactic Radiosurgery in BRAFV600 Melanoma With Brain Metastasis	Active (recruiting)	2022-09-05	N/A	Phase II	Class I	BRAF V600	Binimetinib, Encorafenib, Pembrolizumab	Melanoma Brain Metastases	150	N/A	UNICANCER	NCT04074096
Encorafenib and Binimetinib With or Without Nivolumab in Treating Patients With Metastatic Radioiodine Refractory BRAF V600 Mutant Thyroid Cancer	Active (recruiting)	2020-10-30	N/A	Phase II	Class I	BRAF V600	Binimetinib + Encorafanib, Nivolumab	Metastatic Thyroid Cancer	40	N/A	Providence Health & Services	NCT04061980
Encorafenib Plus Cetuximab in a Neoadjuvant Setting in Patients With BRAF Mutation Localised Colon or Upper Rectum Cancer	Active (recruiting)	2023-02-13	N/A	Phase II	Class I	BRAF V600E	Cetuximab, Encorafenib	Colorectal Cancer	30	N/A	Federation Francophone de Cancerologie Digestive, Paris HEGP	NCT05706779
HL-085+Vemurafenib to Treat Advanced Melanoma Patients With BRAF V600E/K Mutation	Active (recruiting)	2021-09-06	N/A	Phase II	Class I	BRAF V600E, BRAF V600K	HL-085 + Vemurafenib	Melanoma	104	N/A	Shanghai Kechow Pharma, Inc.	NCT05263453
Hydroxychloroquine in Combination With Encorafenib and Cetuximab or Panitumumab in the Treatment of Metastatic BRAF-mutated Colorectal Cancer Refractory	Active (recruiting)	2022-10-10	N/A	Phase II	Class I	BRAF V600E	Hydroxychloroquine + Encorafenib + Cetuximab, Panitumumab	Metastatic Colorectal Cancer	43	N/A	Northwestern University	NCT05576896
Neoadjuvant Encorafenib, Binimetinib and Cetuximab for Patients With BRAF V600E Mutated/pMMR Localized Colorectal Cancer	Active (recruiting)	2022-09-01	N/A	Phase II	Class I	BRAF V600E	Binimetinib, Cetuximab, Encorafenib	Colorectal Cancer	48	N/A	AIO-Studien-gGmbH, Hämatologisch-Onkologische Praxis Eppendorf	NCT05510895
Neoadjuvant Immunotherapy in Rare Mutations Localized NSCLC	Active (recruiting)	2023-04-04	N/A	Phase II	Any	BRAF	Carboplatin + Nab paclitaxel + Pemetrexed + Toripalimab	Non-Small Cell Lung Cancer	30	N/A	Guangdong Provincial People's Hospital	NCT05800340
Regorafenib, With Cetuximab or Panitumumab, for the Treatment of Unresectable, Locally Advanced, or Metastatic Colorectal Cancer	Active (recruiting)	2020-03-03	N/A	Phase II	None	BRAF V600E WT	Cetuximab + Irinotecan + Panitumumab, Regorafenib	Colorectal Cancer	124	N/A	Academic and Community Cancer Research United	NCT04117945
Study of Cemiplimab Combined With Dabrafenib and Trametinib in People With Anaplastic Thyroid Cancer	Active (recruiting)	2020-01-20	N/A	Phase II	Class I	BRAF V600E	Dabrafenib, Trametinib	Anaplastic Thyroid Cancer	15	N/A	Memorial Sloan Kettering Cancer Center	NCT04238624
Testing the Addition of Nivolumab to Standard Treatment for Patients With Metastatic or Unresectable Colorectal Cancer That Have a BRAF Mutation	Active (recruiting)	2022-07-19	N/A	Phase II	Class I	BRAF V600E	Cetuximab + Encorafenib + Nivolumab, Cetuximab + Encorafenib	Colorectal Cancer	84	N/A	National Cancer Institute (NCI)	NCT05308446
The Efficacy of HLX208 (BRAF V600E Inhibitor) for Refractory Primary Brain Tumors With BRAF Mutation After First-line Treatment	Active (recruiting)	2021-12-23	N/A	Phase II	Any	BRAF	HLX208	Brain Tumor (Primary)	40	N/A	Shanghai Henlius Biotech	NCT05092802
Treatment of BRAF ( B-Rapidly Accelerated Fibrosarcoma) Mutated Papillary Craniopharyngioma	Active (recruiting)	N/A	N/A	Phase II	Class I	BRAF V600E	Dabrafenib + Trametinib	Papillary Craniopharyngioma	25	N/A	Eva Marie Erfurth, MD, PhD	NCT05525273
Vemurafenib and Cobimetinib in Treating Patients With BRAF V600E Mutation Positive Craniopharyngioma	Active (recruiting)	2017-08-04	N/A	Phase II	Class I	BRAF V600E	Cobimetinib, Vemurafenib	Papillary Craniopharyngioma	36	N/A	Alliance for Clinical Trials in Oncology, Massachusetts General Hospital	NCT03224767
A Phase II Study of Single Agent MEK162 in Patients With Advanced Melanoma	Completed	2011-03-24	2023-02-06	Phase II	Class I	BRAF V600E	MEK162	Metastatic Melanoma	183	0.12	Pfizer	NCT01320085
A Study of GSK2118436 in BRAF Mutant Metastatic Melanoma to the Brain	Completed	2011-02-01	2012-11-01	Phase II	Class I	BRAF V600E, BRAF V600K	GSK2118436	Metastatic Melanoma	172	0.405	GlaxoSmithKline	NCT01266967
A Study of Vemurafenib (RO5185426) in Participants With Metastatic or Unresectable Papillary Thyroid Cancer Positive for the BRAF V600 Mutation	Completed	2011-06-01	2015-05-01	Phase II	Class I	BRAF V600	Vemurafenib	Papillary Thyroid Cancer	51	0.423	Hoffmann-La Roche	NCT01286753
A Study of Vemurafenib in Participants With BRAF V600 Mutation-Positive Cancers	Completed	2012-04-12	2016-10-28	Phase II	Class I	BRAF V600	Cetuximab, Vemurafenib	Solid tumors, multiple myeloma	208	0.615	Hoffmann-La Roche	NCT01524978
A Study to Detect V-Raf Murine Sarcoma Viral Oncogene Homolog B1 (BRAF) V600 Mutation on Cell-Free Deoxyribonucleic Acid (cfDNA) From Plasma in Participants With Advanced Melanoma	Completed	2016-05-23	2019-06-27	Phase II	Class I	BRAF V600	Cobimetinib + Vemurafenib	Melanoma	40	N/A	Hoffmann-La Roche	NCT02768207
An Open-label Study of GSK1120212 Compared With Docetaxel in Stage IV KRAS-mutant Non-small Cell Lung Cancer	Completed	2011-09-01	2013-09-01	Phase II	Any	BRAF	Docetaxel, GSK1120212	Non-Small Cell Lung Cancer	134	0.12	GlaxoSmithKline	NCT01362296
BRAF Inhibitor, LGX818, Utilizing a Pulsatile Schedule in Patients With Stage IV or Unresectable Stage III Melanoma Characterized by a BRAFV600 Mutation	Completed	2013-07-01	2016-03-17	Phase II	Class I	BRAF V600	LGX818	Melanoma	7	0.57	Memorial Sloan Kettering Cancer Center	NCT01894672
Comparison of AZD6244 in Combination With Dacarbazine Versus (vs) Dacarbazine Alone in BRAF Mutation Positive Melanoma Patients	Completed	2009-07-01	2014-11-01	Phase II	Any	BRAF	AZD6244, Dacarbazine	Melanoma	385	0.29	AstraZeneca	NCT00936221
Dabrafenib and Trametinib in People With BRAF V600E Mutation Positive Lesions in Erdheim Chester Disease	Completed	2014-11-01	2018-08-29	Phase II	Class I	BRAF V600E, BRAF V600K	Dabrafenib, Trametinib	Erdheim Chester Disease	9	0.667	National Human Genome Research Institute	NCT02281760
Dabrafenib and Trametinib in Treating Patients With BRAF Mutated Ameloblastoma	Completed	2017-07-17	2019-06-26	Phase II	Any	Dabrafinib-sensitive BRAF	Dabrafenib, Trametinib	Ameloblastoma	1	N/A	Novartis Pharmaceuticals, Stanford University	NCT02367859
Dabrafenib, Trametinib, and Spartalizumab for the Treatment of BRAF V600E or V600K Mutation Positive Stage IIIB/C/D Melanoma	Completed	2020-01-29	2023-10-09	Phase II	Class I	BRAF V600E, BRAF V600K	Dabrafenib + Spartalizumab + Trametinib	Melanoma	4	N/A	M.D. Anderson Cancer Center	NCT04310397
Efficacy and Safety of the Combination Therapy of Dabrafenib and Trametinib in Subjects With BRAF V600E- Mutated Rare Cancers	Completed	2014-03-12	2021-12-10	Phase II	Class I	BRAF V600E	Dabrafenib + Trametinib	Rare Cancers	206	0.89	Novartis Pharmaceuticals	NCT02034110
Japan PhI/II of GSK2118436 and GSK1120212 Combination in Subjects With BRAF V600E/K Mutation Positive Advanced Solid Tumors (Phase I Part) or Cutaneous Melanoma (Phase II Part)	Completed	2013-08-15	2016-07-04	Phase II	Class I	BRAF V600E, BRAF V600K	Dabrafenib + Trametinib	Solid tumor basket trial	12	N/A	GlaxoSmithKline	NCT01928940
LCCC 1128: Open Label Phase II Trial of the BRAF Inhibitor (Dabrafenib) and the MEK Inhibitor (Trametinib) in Unresectable Stage III and Stage IV BRAF Mutant Melanoma; Correlation of Resistance With the Kinome and Functional Mutations	Completed	2013-04-04	2020-09-17	Phase II	Class I	BRAF V600E, BRAF V600K	Dabrafenib + Trametinib	Melanoma	17	0.76	UNC Lineberger Comprehensive Cancer Center	NCT01726738
Neoadjuvant Treatment of Colon Cancer	Completed	2010-04-01	2015-03-01	Phase II	Any	BRAF	Capecitabine, Oxaliplatin, Panitumumab	Colon Cancer	76	N/A	Vejle Hospital	NCT01108107
Regorafenib+FOLFIRI Versus Placebo+FOLFIRI as 2nd Line Tx in Metastatic Colorectal Cancer	Completed	2011-04-07	2020-10-02	Phase II	Not Mentioned	Not Mentioned	FOLFIRI + Regorafenib	Metastatic Colorectal Cancer	181	0.343	UNC Lineberger Comprehensive Cancer Center	NCT01298570
Selumetinib in Cancers With BRAF Mutations	Completed	2009-07-01	2015-01-01	Phase II	Any	BRAF	Selumetinib	Adult Solid Neoplasm	28	N/A	National Cancer Institute (NCI)	NCT00888134
Study of Efficacy and Safety of Dabrafenib in Combination With Trametinib in Pediatric Patients With BRAF V600 Mutation Positive LGG or Relapsed or Refractory HGG Tumors	Completed	2017-12-28	2023-04-28	Phase II	Class I	BRAF V600	Carboplatin + Vincristine, Dabrafenib +Trametinib	Glioma	151	0.561	Novartis Pharmaceuticals	NCT02684058
Study of FOLFIRI + Panitumumab Using Ultra-selection Technology of Patients With Stage IV Colorectal Cancer Refractory to Irinotecan Without Any Mutation on KRAS, PIK3Ca, BRAF and NRAS Genes Detected With Highly Sensitive Techniques	Completed	2012-10-01	2016-07-01	Phase II	None	WT BRAF	FOLFIRI + Panitumab	Metastatic Colorectal Cancer	72	0.51	Spanish Cooperative Group for the Treatment of Digestive Tumours (TTD)	NCT01704703
Study of Selective BRAF Kinase Inhibitor Dabrafenib Monotherapy Twice Daily and in Combination With Dabrafenib Twice Daily and Trametinib Once Daily in Combination Therapy in Subjects With BRAF V600E Mutation Positive Metastatic (Stage IV) Non-small Cell Lung Cancer.	Completed	2011-08-05	2021-01-07	Phase II	Class I	BRAF V600E	Dabrafenib, Dabrafenib + Trametinib	Metastatic NSCLC	177	0.684	Novartis Pharmaceutials	NCT01336634
Study to Determine the Effectiveness of GSK1120212 in BRAF Mutation-positive Melanoma Previously Treated With or Without a BRAF Inhibitor	Completed	2009-11-01	2013-01-01	Phase II	Class I	BRAF V600E, BRAF V600K, BRAF V600D	GSK1120212	Melanoma	97	0.25	GlaxoSmithKline	NCT01037127
Study to Evaluate Treatment of Dabrafenib Plus Trametinib in Subjects With BRAF Mutation-Positive Melanoma That Has Metastasized to the Brain	Completed	2014-02-21	2018-02-14	Phase II	Class I	BRAF V600E, BRAF V600K, BRAF V600D, BRAF V600R	Dabrafenib + Trametinib	Melanoma Brain Metastases	127	0.647	Novartis Pharmaceutials	NCT02039947
Study to Investigate the Objective Response Rate of Dabrafenib in Combination With Trametinib in Subjects With BRAF V600 Mutation-Positive Melanoma	Completed	2014-03-18	2021-04-19	Phase II	Class I	BRAF V600	Dabrafenib + Trametinib	Melanoma	77	0.61	Novartis Pharmaceuticals	NCT02083354
Trametinib in Treating Patients With Advanced Melanoma With BRAF Non-V600 Mutations	Completed	2015-01-01	2021-04-16	Phase II	Class II, III	Non-V600 BRAF	Trametinib	Melanoma	9	0.66	Vanderbilt-Ingram Cancer Center	NCT02296112
Vemurafenib and Cobimetinib Combination in BRAF Mutated Melanoma With Brain Metastasis	Completed	2015-12-01	2019-11-06	Phase II	Class I	BRAF V600	Cobimetinib + Vemurafenib	Metastatic Melanoma	43	N/A	Center Eugene Marquis	NCT02537600
Cetuximab and Vemurafenib Plus FOLFIRI for BRAF V600E Mutated Advanced Colorectal Cancer (IMPROVEMENT)	Unknown status	2018-10-08	N/A	Phase II	Class I	BRAF V600E	Cetuximab + Vemurafenib	Colorectal Cancer	30	N/A	Shanghai Changzheng Hospital	NCT03727763
Dabrafenib and Trametinib in Patients With Non-small Cell Lung Cancer Harboring V600E BRAF Mutation	Unknown status	N/A	N/A	Phase II	Class I	BRAF V600E	Dabrafenib + Trametinib	Non-Small Cell Lung Cancer	27	N/A	Asan Medical Center	NCT03543306
Efficacy of MEK (Trametinib) and BRAFV600E (Dabrafenib) Inhibitors With Radioactive Iodine (RAI) for the Treatment of Refractory Metastatic Differentiated Thyroid Cancer	Unknown status	2017-12-27	N/A	Phase II	Class I	BRAF V600E	Dabrafenib + Trametinib + rhTSH	Metastatic Thyroid Cancer	40	N/A	Gustave Roussy, Cancer Campus, Grand Paris	NCT03244956

## Sheet: Phase II & III
Name of Trial	Status	Study Start	Study End	Phase	Class of BRAF	Mutation/fusion	Treatment	Cancer Type(s)	Number of Patients Enrolled	Highest ORR (overall response rate)	Sponsor	NCT number
DETERMINE (Determining Extended Therapeutic Indications for Existing Drugs in Rare Molecularly Defined Indications Using a National Evaluation Platform Trial) - Master Screening Protocol	Active (recruiting)	2023-03-01	N/A	Phase II & III	Not Mentioned	Not Mentioned	Alectinib, Atezolizumab, Entrectinib, Trastuzumab + Pertuzumab, Vemurafenib + Cobimetinib	Basket Trial	825	N/A	Cancer Research UK	NCT05722886
DETERMINE Trial Treatment Arm 05: Vemurafenib in Combination With Cobimetinib in Adult Patients With BRAF Positive Cancers.	Active (recruiting)	2023-03-01	N/A	Phase II & III	Class I	BRAF V600	Cobimetinib + Vemurafenib	Basket Trial	30	N/A	Cancer Research UK	NCT05768178

## Sheet: Phase III
Name of Trial	Status	Study Start	Study End	Phase	Class of BRAF	Mutation/fusion	Treatment	Cancer Type(s)	Number of Patients Enrolled	Highest ORR (overall response rate)	Sponsor	NCT number
A Study Comparing GSK2118436 to Dacarbazine (DTIC) in Previously Untreated Subjects With BRAF Mutation Positive Advanced (Stage III) or Metastatic (Stage IV) Melanoma	Completed	2010-12-23	2016-09-16	Phase III	Class I	BRAF V600E	Dacarbazine, GSK2118436	Melanoma	251	0.599	GlaxoSmithKline	NCT01227889
A Study Comparing Trametinib and Dabrafenib Combination Therapy to Dabrafenib Monotherapy in Subjects With BRAF-mutant Melanoma	Completed	2012-05-04	2019-02-28	Phase III	Any	BRAF V600E, BRAF V600K	Dabrafenib, Dabrafenib + Trametinib	Melanoma	423	0.695	Novartis Pharmaceutials	NCT01584648
A Study Comparing Vemurafenib Versus Vemurafenib Plus Cobimetinib in Participants With Metastatic Melanoma	Completed	2013-01-08	2019-07-21	Phase III	Class I	BRAF V600	Cobimetinib + Vemurafenib, Vemurafenib	Melanoma	495	0.696	Hoffmann-La Roche	NCT01689519
A Study of Vemurafenib (RO5185426) in Comparison With Dacarbazine in Previously Untreated Patients With Metastatic Melanoma (BRIM 3)	Completed	2010-01-01	2015-07-01	Phase III	Class I	BRAF V600E	Dacarbazine, Vemurafenib	Metastatic Melanoma	675	0.484	Hoffmann-La Roche	NCT01006980
Dabrafenib Plus Trametinib vs Vemurafenib Alone in Unresectable or Metastatic BRAF V600E/K Cutaneous Melanoma	Completed	2012-06-04	2019-04-25	Phase III	Class I	BRAF V600E, BRAF V600K	Dabrafenib + Trametinib, Vemurafenib	Cutaneous Melanoma	704	0.68	Novartis Pharmaceutials	NCT01597908
Dabrafenib With Trametinib in the Adjuvant Treatment of High-risk BRAF V600 Mutation-positive Melanoma (COMBI-AD).	Completed	2013-01-08	2023-07-31	Phase III	Class I	BRAF V600E, BRAF V600K	Dabrafenib + Trametinib	Melanoma	870	N/A	Novartis Pharmaceutials	NCT018682083
GSK1120212 vs Chemotherapy in Advanced or Metastatic BRAF V600E/K Mutation-positive Melanoma	Completed	2010-11-22	2016-12-16	Phase III	Class I	BRAF V600E, BRAF V600K	Trametinib	Melanoma	322	0.285	GlaxoSmithKline	NCT01245062
Study of Dabrafenib+Trametinib in the Adjuvant Treatment of Stage III BRAF V600+ Melanoma After Complete Resection to Evaluate the Impact on Pyrexia Related Outcomes	Completed	2018-08-29	2021-09-16	Phase III	Class I	BRAF V600E, BRAF V600K	Dabrafenib + Trametinib	Melanoma	556	N/A	Novartis Pharmaceuticals	NCT03551626
A Clinical Trial of Three Study Medicines (Encorafenib, Binimetinib, and Pembrolizumab) in Patients With Advanced or Metastatic Melanoma	Active, recruiting	2018-04-20	N/A	Phase III	Class I	BRAF V600E, BRAF V600K	Bimetinib + Encorafenib + Pembrolizumab	Melanoma	624	N/A	Pfizer	NCT04657991
Adjuvant Encorafenib and Binimetinib in High-risk Stage II Melanoma With a BRAF Mutation.	Active, recruiting	2022-05-02	N/A	Phase III	Class I	BRAF V600E, BRAF V600K	Binimetinib + Encorafanib	Melanoma	815	N/A	Pierre Fabre Medicament	NCT05270044
Study in mCRC Patients RAS/BRAF wt Tissue and RAS Mutated LIquid BIopsy to Compare FOLFIRI Plus CetuxiMAb or BevacizumaB	Active, recruiting	2021-04-30	N/A	Phase III	None	WT BRAF	Bevacizumab, Cetuximab, Calcium Ievofolinate, Irinotecan, 5-FU	Metastatic Colorectal Cancer	280	N/A	Azienda Unita Sanitaria Locale Reggio Emilia	NCT04776655

## Sheet: Phase IV
Name of Trial	Status	Study Start	Study End	Phase	Class of BRAF	Mutation/fusion	Treatment	Cancer Type(s)	Number of Patients Enrolled	Highest ORR (overall response rate)	Sponsor	NCT number
Clinical Study To Further Evaluate The Efficacy Of Dabrafenib Plus Trametinib In Patients With Rare BRAF V600E Mutation-Positive Unresectable or Metastatic Solid Tumors	Not Yet Recruiting	N/A	N/A	Phase IV	Class I	BRAF V600E	Dabrafenib, Trametinib	Basket Trial	40	N/A	Novartis Pharmaceutials	NCT05868629
Dabrafenib and/or Trametinib Rollover Study	Active (recruiting)	2017-12-28	N/A	Phase IV	Any	BRAF	Dabrafenib + Trametinib, Dabrafenib, Trametinib	Basket Trial	100	N/A	Novartis Pharmaceuticals	NCT03340506
An Extension (Rollover) Study of Vemurafenib in Participants With BRAF V600 Mutation-Positive Malignancies Previously Enrolled in an Antecedent Vemurafenib Protocol	Completed	2013-02-19	2020-02-17	Phase IV	Class I	BRAF V600	Vemurafenib	Basket Trial	215	N/A	Hoffmann-La Roche	NCT01739764
An Open-Label Study of Zelboraf (Vemurafenib) in Patients With Braf V600 Mutation Positive Metastatic Melanoma	Completed	2013-10-17	2019-05-22	Phase IV	Class I	BRAF V600	Zelboraf	Metastatic Melanoma	60	N/A	Hoffmann-La Roche	NCT01898585

## Sheet: Phase not specified
Name of Trial	Status	Study Start	Study End	Phase	Class of BRAF	Mutation/fusion	Treatment	Cancer Type(s)	Number of Patients Enrolled	Highest ORR (overall response rate)	Sponsor	NCT number
Evaluate the Efficacy and Safety of Aspirin in Combination With Trametinib and Dabrafenib	Not Yet Recruiting	N/A	N/A	N/A	Class I	BRAF V600E	Dabrafenib + Trametinib + Aspirin	Non-Small Cell Lung Cancer	36	N/A	Daping Hospital and the Research Institute of Surgery of the Third Military Medical University	NCT05988697
Evaluation of Some Risk Factors Associated With Colorectal Cancer	Not Yet Recruiting	N/A	N/A	N/A	Any	BRAF	N/A (observational)	Colorectal Cancer	100	N/A	Assiut University	NCT05170360
A Clinical-biological Prospective Cohort of Patients With BRAFV600E-mutated Metastatic Colorectal Cancer	Active (recruiting)	2023-07-24	N/A	N/A	Class I	BRAF V600E	N/A (Sample collecting)	Metastatic Colorectal Cancer	400	N/A	UNICANCER	NCT05639413
A Prospective Observational Study on Targeted Therapy for Unresectable or Metastatic BRAFV600E Mutant Melanoma Patients	Active (recruiting)	2021-02-02	N/A	N/A	Class I	BRAF V600E	N/A (observational)	Melanoma	400	N/A	Pierre Fabre Medicament	NCT04911998
A Study in Patients With BRAF V600E-mutant Metastatic Non-small Cell Lung Cancer (OCTOPUS)	Active (recruiting)	2022-06-23	N/A	N/A	Class I	BRAF V600E	N/A (observational)	Metastatic NSCLC	200	N/A	Pierre Fabre Medicament	NCT05546905
Adjuvant Dabrafenib and Trametinib Treatment in Patients With Completely Resected High-risk Stage III Melanoma.	Active (recruiting)	2021-12-01	N/A	N/A	Class I	BRAF V600E	Dabrafenib + Trametinib	Melanoma	84	N/A	Novartis Pharmaceuticals	NCT04961619
BRAF Inhibitor Encorafenib And Cetuximab Real Life Investigation of Next Generation CRC Treatment	Active (recruiting)	2020-09-03	N/A	N/A	Class I	BRAF V600E	Cetuximab + Encorafenib	Metastatic Colorectal Cancer	500	N/A	Pierre Fabre Pharma GmbH	NCT04673955
Early Rebiopsy to Identify Biomarkers of Tumor Cell Survival Following EGFR, ALK, ROS1 or BRAF TKI Therapy	Active (recruiting)	2016-04-20	N/A	N/A	Class I	BRAF V600E	N/A (observational)	Lung Adenocarcinoma	20	N/A	University of Colorado, Denver	NCT03042221
Effectiveness and Safety of Dabrafenib in Combination With Trametinib as Adjuvant Treatment for Chinese Patients With Stage III BRAF V600 Mutation-positive Melanoma After Complete Resection	Active (recruiting)	2020-12-31	N/A	N/A	Class I	BRAF V600	Dabrafenib + Trametinib	Melanoma	80	N/A	Novartis Pharmaceuticals	NCT04666272
Real Word European Registry of NTRK Fusions and Other Rare Actionable Fusions (TRacKING)	Active (recruiting)	2021-06-22	N/A	N/A	Any	BRAF fusion	N/A (observational)	Basket Trial	500	N/A	Centre Leon Berard	NCT04921553
Real-Time Monitoring of Symptoms in Lung Cancer Patients Receiving Oral Targeted Therapies	Active (recruiting)	2022-08-25	N/A	N/A	Any	BRAF	Device-based interventions	Non-Small Cell Lung Cancer	75	N/A	University of Virginia	NCT05370469
A Retrospective Non Interventional Study on First Line Treatment for Patients With BRAFV600E Mutant Metastatic Colorectal Cancer (mCRC)	Completed	2020-04-12	2021-05-12	N/A	Class I	BRAF V600E	N/A (observational)	Metastatic Colorectal Cancer	274	N/A	Pierre Fabre Medicament	NCT04317599
A Screening Study to Detect BRAF V600 Mutation-Positive Patients For Enrollment Into Clinical Research Studies of Zelboraf (Vemurafenib)	Completed	2012-12-01	2013-09-01	N/A	Class I	BRAF V600	N/A (observational)	Solid tumor basket trial	662	N/A	Genentech, Inc.	NCT01804140
A Study of Adult Participants With BRAF V600 Mutation-Positive Advanced Melanoma Treated With Cobimetinib (Cotellic®) During the French Early Access Program (Temporary Authorization for Use [TAU])	Completed	2016-10-27	2018-08-22	N/A	Class I	BRAF V600	Cobimetinib + Vemurafenib	Melanoma	200	N/A	Hoffmann-La Roche	NCT03139513
Advanced Melanoma in Russian Experience	Completed	2018-10-08	2019-04-27	N/A	Class I	BRAF V600	N/A (observational)	Melanoma	382	0.574	MelanomaPRO, Russia	NCT03663647
An Observational Safety Study in Zelboraf (Vemurafenib)-Treated Patients With BRAF-V600 Mutation-Positive Unresectable or Metastatic Melanoma (ZeSS)	Completed	2013-03-23	2016-07-26	N/A	Class I	BRAF V600	Vemurafenib	Melanoma	339	N/A	Hoffmann-La Roche	NCT01990248
Biomarkers in Blood Samples From Patients With Refractory Non-Small Cell Lung Cancer Previously Treated With Sorafenib Tosylate	Completed	2010-06-13	2010-07-13	N/A	Any	BRAF	N/A (Sample collecting)	Non-Small Cell Lung Cancer	80	N/A	ECOG-ACRIN Cancer Research Group	NCT01124669
Biomarkers in Predicting Response to Cetuximab in Patients With Advanced Colorectal Cancer	Completed	2009-11-01	2018-01-01	N/A	Class I	BRAF V600E	N/A (observational)	Colorectal Cancer	1142	N/A	Alliance for Clinical Trials in Oncology	NCT01243372
BRAF V600-mutated Lung Carcinoma Treated With the Combination of Dabrafenib-trametinib: a Retrospective Evaluation	Completed	2021-03-08	2021-12-31	N/A	Class I	BRAF V600	N/A (observational)	Non-Small Cell Lung Cancer	163	N/A	Intergroupe Francophone de Cancerologie Thoracique, Novartis Pharmaceutials	NCT04775095
cKIT, BRAF/NRAS Mutations in Advanced Melanoma : Clinical Outcome in Response to Tyrosine-kinase Inhibitors - KitMel Project	Completed	2011-01-01	2014-02-01	N/A	Any	BRAF	N/A (observational)	Melanoma	288	0.571	Rennes University Hospital	NCT01543113
Comparison of In-House Methods and Cobas BRAF V600 Mutation Assay in Melanoma Tumor Samples	Completed	2012-12-01	2013-04-01	N/A	Class I	BRAF V600	N/A (observational)	Melanoma	420	N/A	Hoffmann-La Roche	NCT01744860
Detection of BRAF Mutation on FNAB From Papillary Thyroid Carcinoma	Completed	2014-12-01	2017-07-01	N/A	Any	BRAF	N/A (Sample collecting)	Papillary Thyroid Cancer	53	N/A	University of Aarhus	NCT02561533
Detection of KRAS, NRAS et BRAF Mutations in Plasma Circulating DNA From Patients With Metastatic Colorectal Cancer	Completed	2016-03-25	2017-05-30	N/A	Any	BRAF	N/A (Sample collecting)	Metastatic Colorectal Cancer	236	N/A	Institut de Cancerologie de Lorraine	NCT02751177
French National Observatory of the Patients With Non-small Cell Lung (NSCLC) and Molecular Testings	Completed	2012-04-01	2013-04-01	N/A	Any	BRAF	N/A (observational)	Non-Small Cell Lung Cancer	17664	N/A	Intergroupe Francophone de Cancerologie Throacique	NCT01700582
OPTImal PALliative Anti-epidermal Growth Factor Receptor Treatment in Metastatic Colorectal Cancer -	Completed	2018-06-01	2022-12-31	N/A	Any	BRAF	N/A (observational)	Metastatic Colorectal Cancer	49	N/A	Karen-Lise Garm Spindler	NCT03750175
Single-arm Study to Evaluate the Safety and Efficacy of Sorafenib, in Subjects With BRAF Mutation Refractory Solid Tumors	Completed	2016-05-30	2016-08-09	N/A	Class I	BRAF	Sorafenib	Solid tumor basket trial	1	N/A	Samsung Medical Center	NCT02450149
Study of Molecular Mechanisms Implicated in the Pathogenesis of Melanoma. Role of Exosomes	Completed	2014-12-01	2023-07-31	N/A	Any	BRAF	N/A (Sample collecting)	Metastatic Melanoma	15	N/A	Centre Hospitalier Universitaire de Nice	NCT02310451
Study to Analyze Mutations in V600 BRAF Oncogen in Participants With Metastatic Melanoma	Completed	2013-06-01	2014-10-01	N/A	Class I	BRAF V600	N/A (observational)	Metastatic Melanoma	264	N/A	Hoffmann-La Roche	NCT02663232
Study to Test Genetic Alterations Among Different Dermoscopic Types of Melanocytic Nevi.	Completed	2006-09-01	2010-04-01	N/A	Any	BRAF	N/A (Sample collecting)	Melanocytic Nevi	43	N/A	Medical University of Graz	NCT00422448
Technical Optimization of Detection of KRAS, BRAF and NRAS Mutations on Tumor DNA Circulating in Metastatic Colorectal Cancer	Completed	2016-02-03	2017-01-19	N/A	Any	BRAF	N/A (Sample collecting)	Metastatic Colorectal Cancer	30	N/A	Institut de Cancerologie de Lorraine	NCT02827565
Compassionate Use Program BRAF Mutation-positive Patients in the Adjuvant Treatment of Melanoma After Surgical Resection	Available	N/A	N/A	N/A	Class I	BRAF V600E, BRAF V600K	Dabrafenib + Trametinib	Melanoma	N/A	N/A	Novartis Pharmaceutials	NCT04544202
Compassionate Use Program to Access Trametinib and Dabrafenib for Patients With BRAF Mutation-positive Metastatic Melanoma	Available	N/A	N/A	N/A	Class I	BRAF V600	Dabrafenib + Trametinib, Dabrafenib, Trametinib	Metastatic Melanoma	N/A	N/A	Novartis Pharmaceuticals	NCT04489433
Expanded Access Program (EAP) for Tovorafenib (DAY101) in RAF-Altered, Relapsed or Refractory Low-Grade Glioma	Available	N/A	N/A	N/A	Any	BRAF	Tovorafenib	Low-Grade Glioma	N/A	N/A	Day One Biopharmaceuticals, Inc.	NCT05760586
Expanded Access to Ulixertinib (BVD-523) in Patients With Advanced MAPK Pathway-Altered Malignancies	Available	N/A	N/A	N/A	Any	BRAF	Ulixertinib (BVD-523)	Solid tumor basket trial	N/A	N/A	xCures	NCT04566393
Managed Access Program Cohort Treatment Plan CTMT212X2002I to Provide Access to Trametinib and Dabrafenib Combination Therapy for Patients With BRAF V600 Mutation-positive Advanced Non-Small Cell Lung CancerManaged Access Program Cohort Treatment Plan CTMT212X2002I to Provide Access to Trametinib and Dabrafenib Combination Therapy for Patients With BRAF V600 Mutation-positive Advanced Non-Small C…	Available	N/A	N/A	N/A	Class I	BRAF V600E, BRAF V600K	Dabrafenib + Trametinib	Non-Small Cell Lung Cancer	N/A	N/A	Novartis Pharmaceuticals	NCT04507919
Detection of Plasmatic Cell-free BRAF and NRAS Mutations : a New Tool for Monitoring Patients With Metastatic Malignant Melanoma Treated With Targeted Therapies or Immunotherapy ( MALT )	Unknown status	N/A	N/A	N/A	Any	BRAF	N/A (observational)	Metastatic Melanoma	35	N/A	Centre Hospitalier Universitaire de Nice	NCT03493230
Mutation Analysis and Copy Number Changes of KRAS and BRAF Gene in Taiwanese Cases of Biliary Tact Adenocarcinoma	Unknown status	2011-01-01	N/A	N/A	Any	BRAF	N/A (observational)	Biliary Tract Adenocarcinoma	100	N/A	Far Eastern Memorial Hospital	NCT01588860
